# Supplementary material for: Mapping pre-harvest sprouting resistance loci in AAC Innova × AAC Tenacious spring wheat population
Source: PubMed Central journal article supplement (PMC8675488; doi:10.1186/s12864-021-08209-6), 2021-12-15
Supplement: 12864_2021_8209_MOESM3_ESM.pdf [file 12864_2021_8209_MOESM3_ESM.pdf]

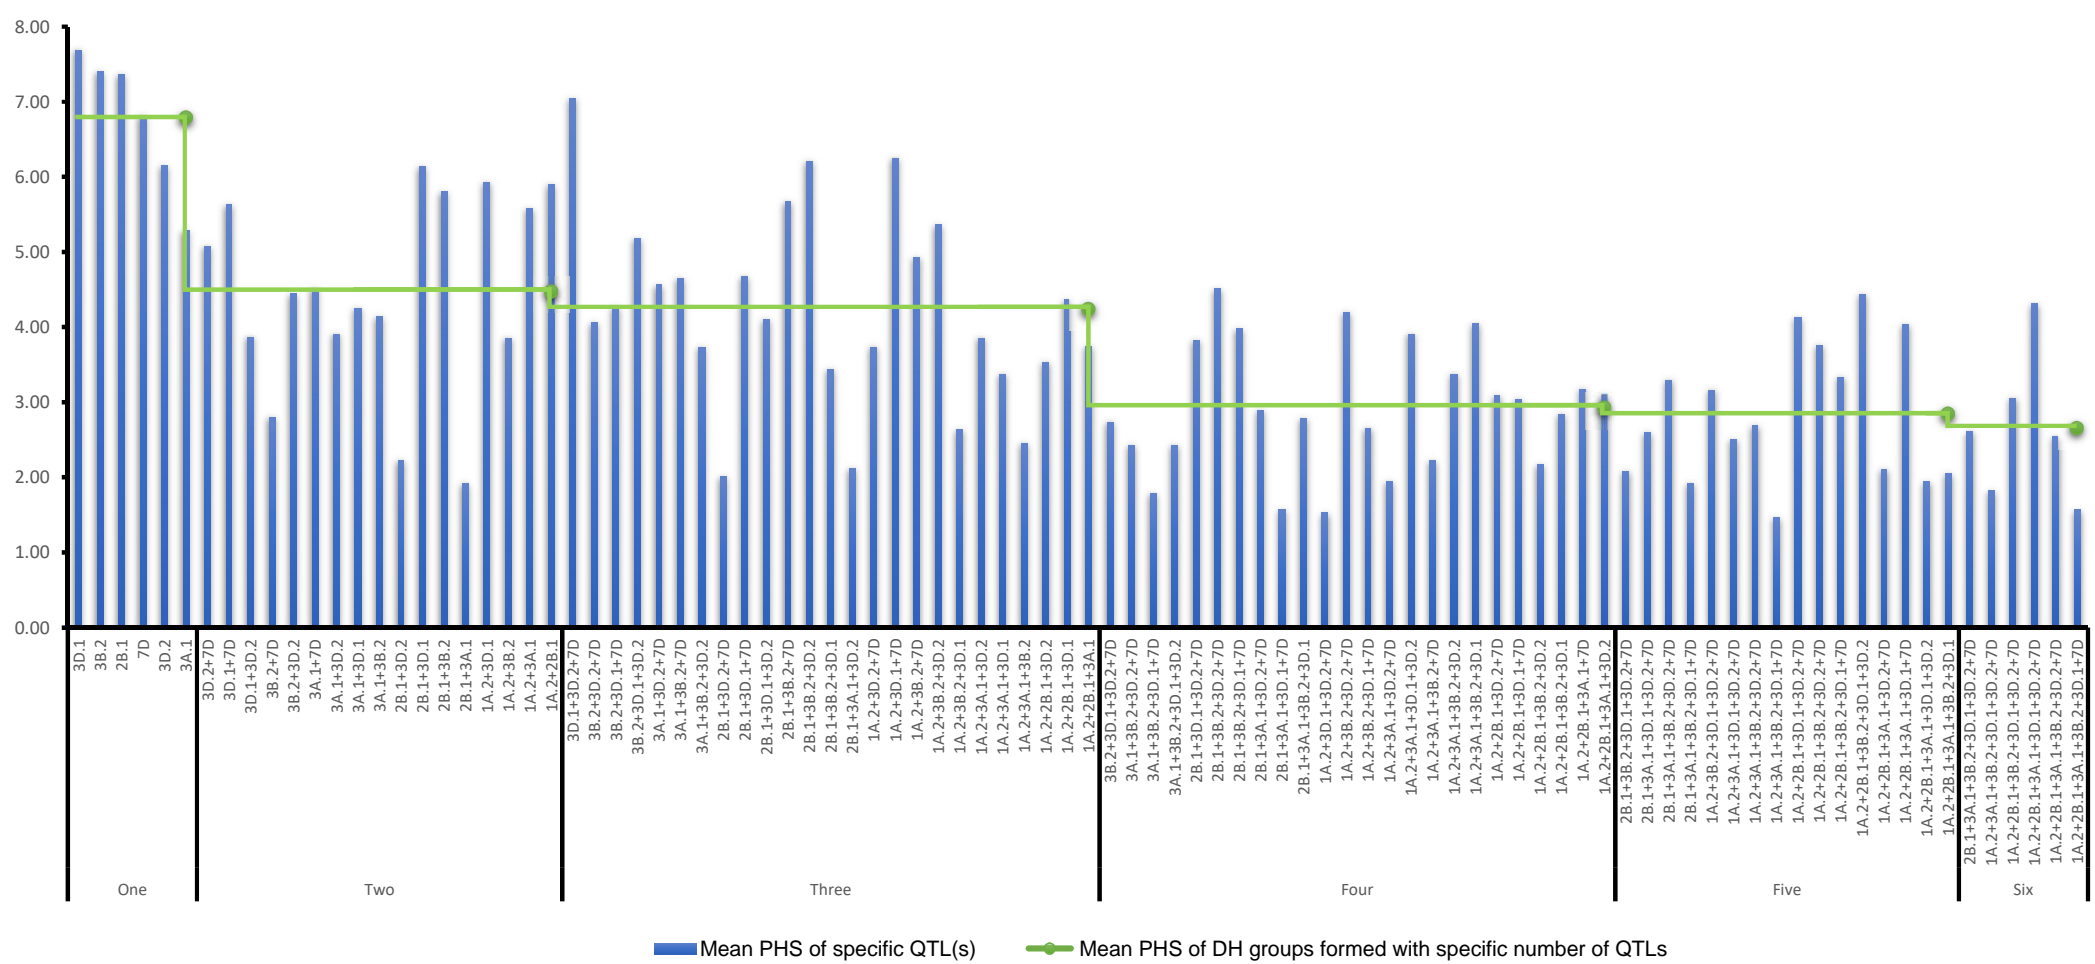

**Figure S2. Effects of pre-harvest sprouting (PHS) resistance quantitative trait loci (QTLs) on sprouting.** Effects of QTLs *QPhs.Irdc-1A.2*, *QPhs.Irdc-2B.1*, *QPhs.Irdc-3A.1*, *QPhs.Irdc-3B.2*, *QPhs.Irdc-3D.1*, *QPhs.Irdc-3D.2* and *QPhs.Irdc-7D*, respectively, shown as 1A.2, 2B.1, 3A.1, 3B.2, 3D.1, 3D.2 and 7D, are presented as bar plot and line graph.
