# Supplementary material for: Mapping pre-harvest sprouting resistance loci in AAC Innova × AAC Tenacious spring wheat population
Source: PubMed Central journal article supplement (PMC8675488; doi:10.1186/s12864-021-08209-6), 2021-12-15
Supplement: 12864_2021_8209_MOESM5_ESM.pdf [file 12864_2021_8209_MOESM5_ESM.pdf]

## Pedigrees of different wheat genotypes of different origin.

Downloaded from: [wheatpedigree.net/](http://wheatpedigree.net/)

Osanai et al. 2015. *Euphytica* (2005) 143: 301-307.

Garlinge, J. (2005), **2005 Crop variety sowing guide for Western Australia. Department of Agriculture and Food, Western Australia, Perth. Bulletin 4655.**

on: 11/19/2020

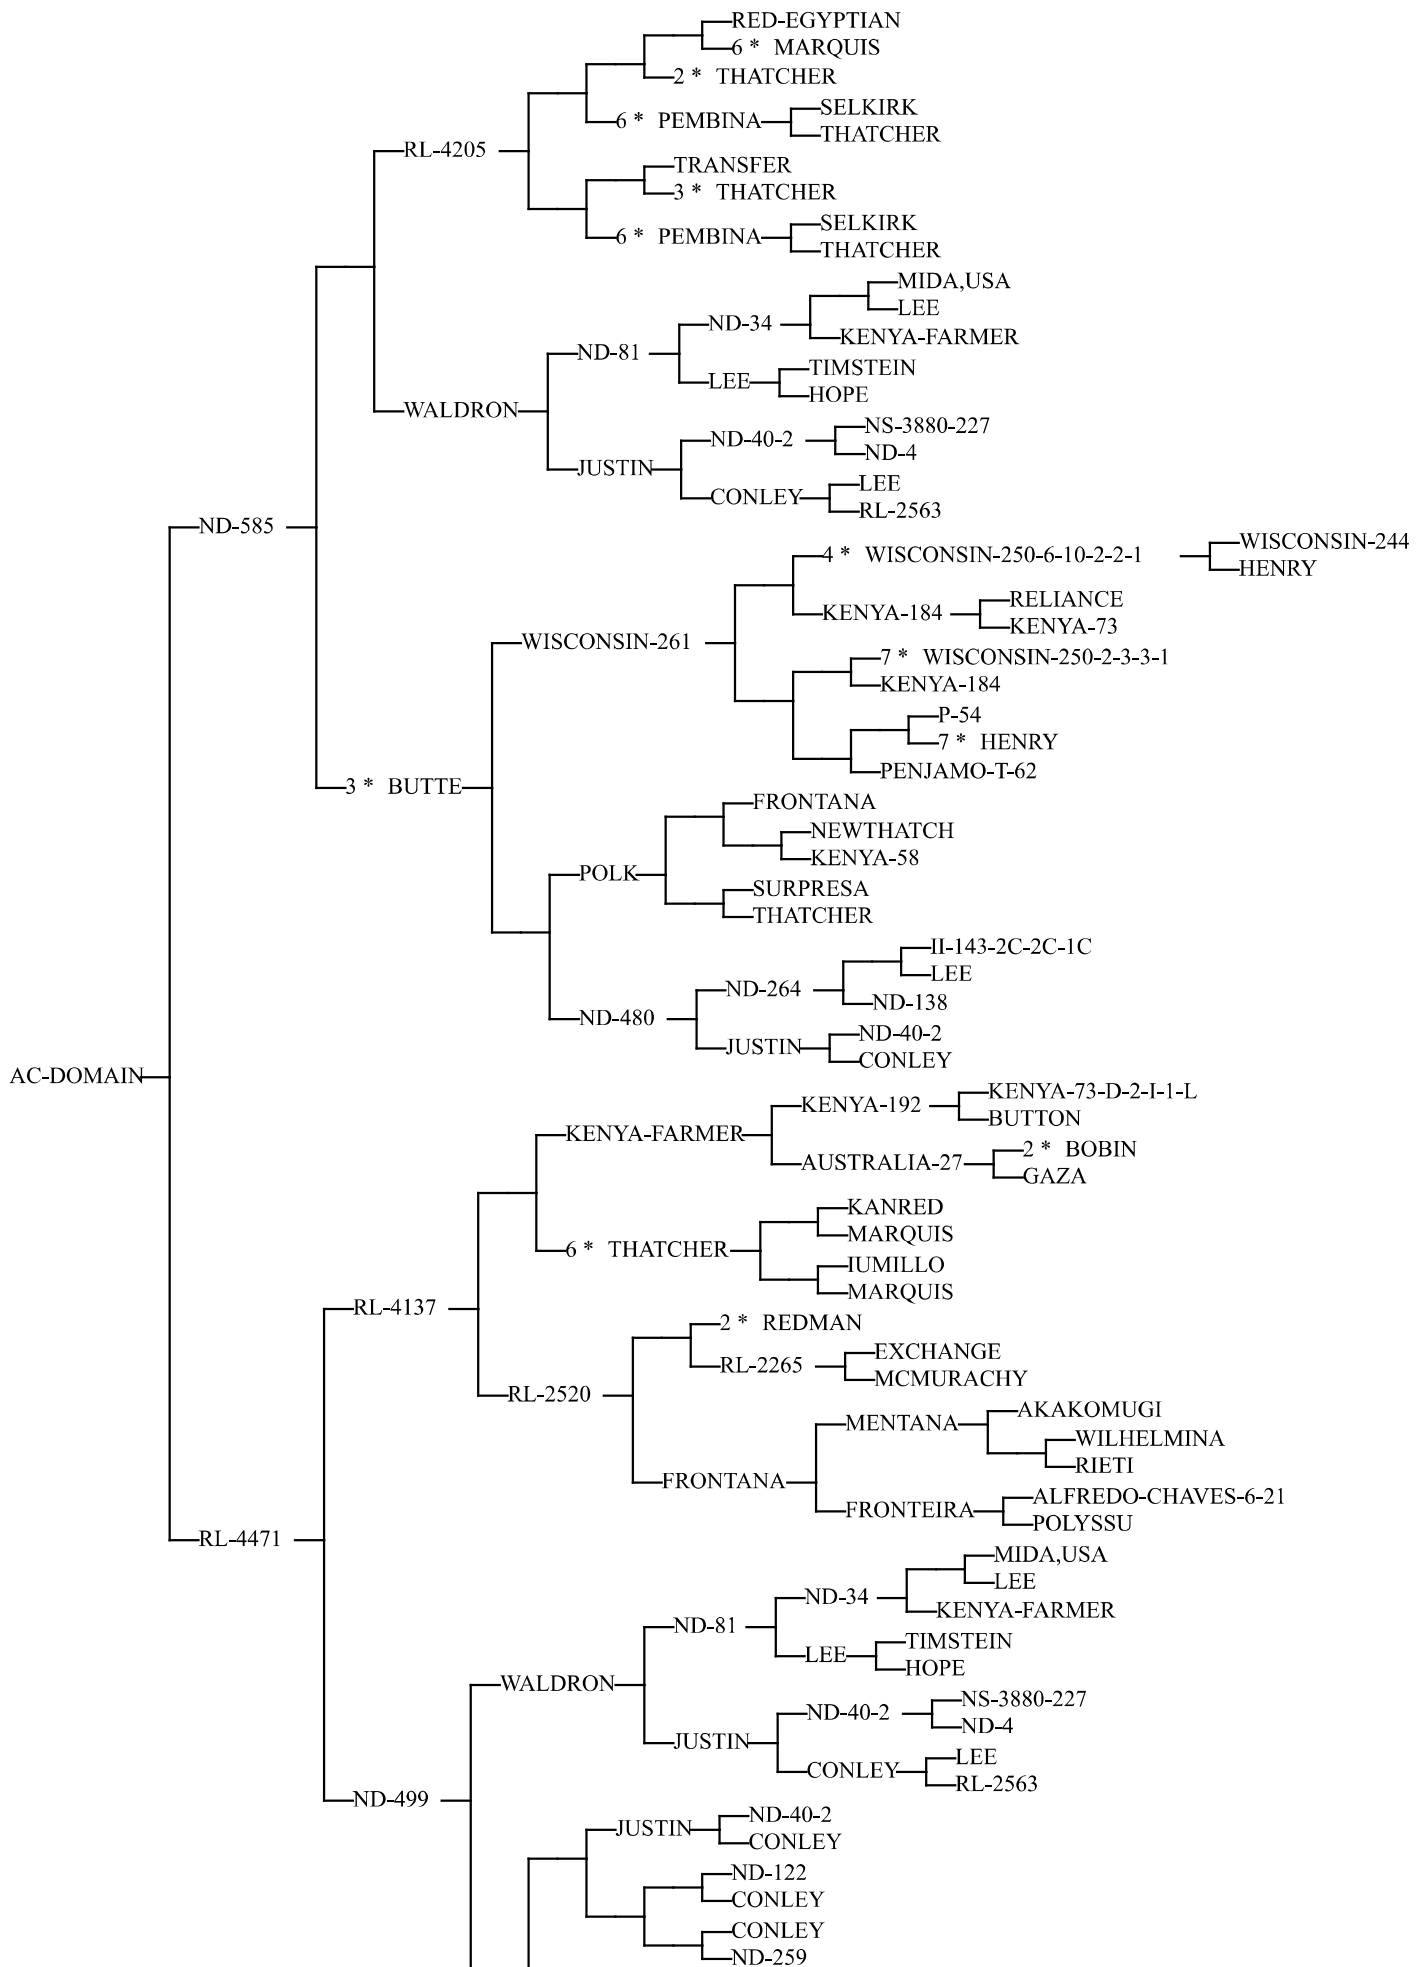

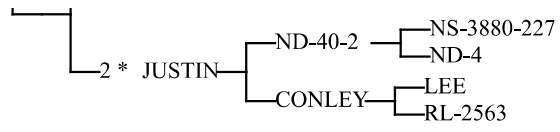

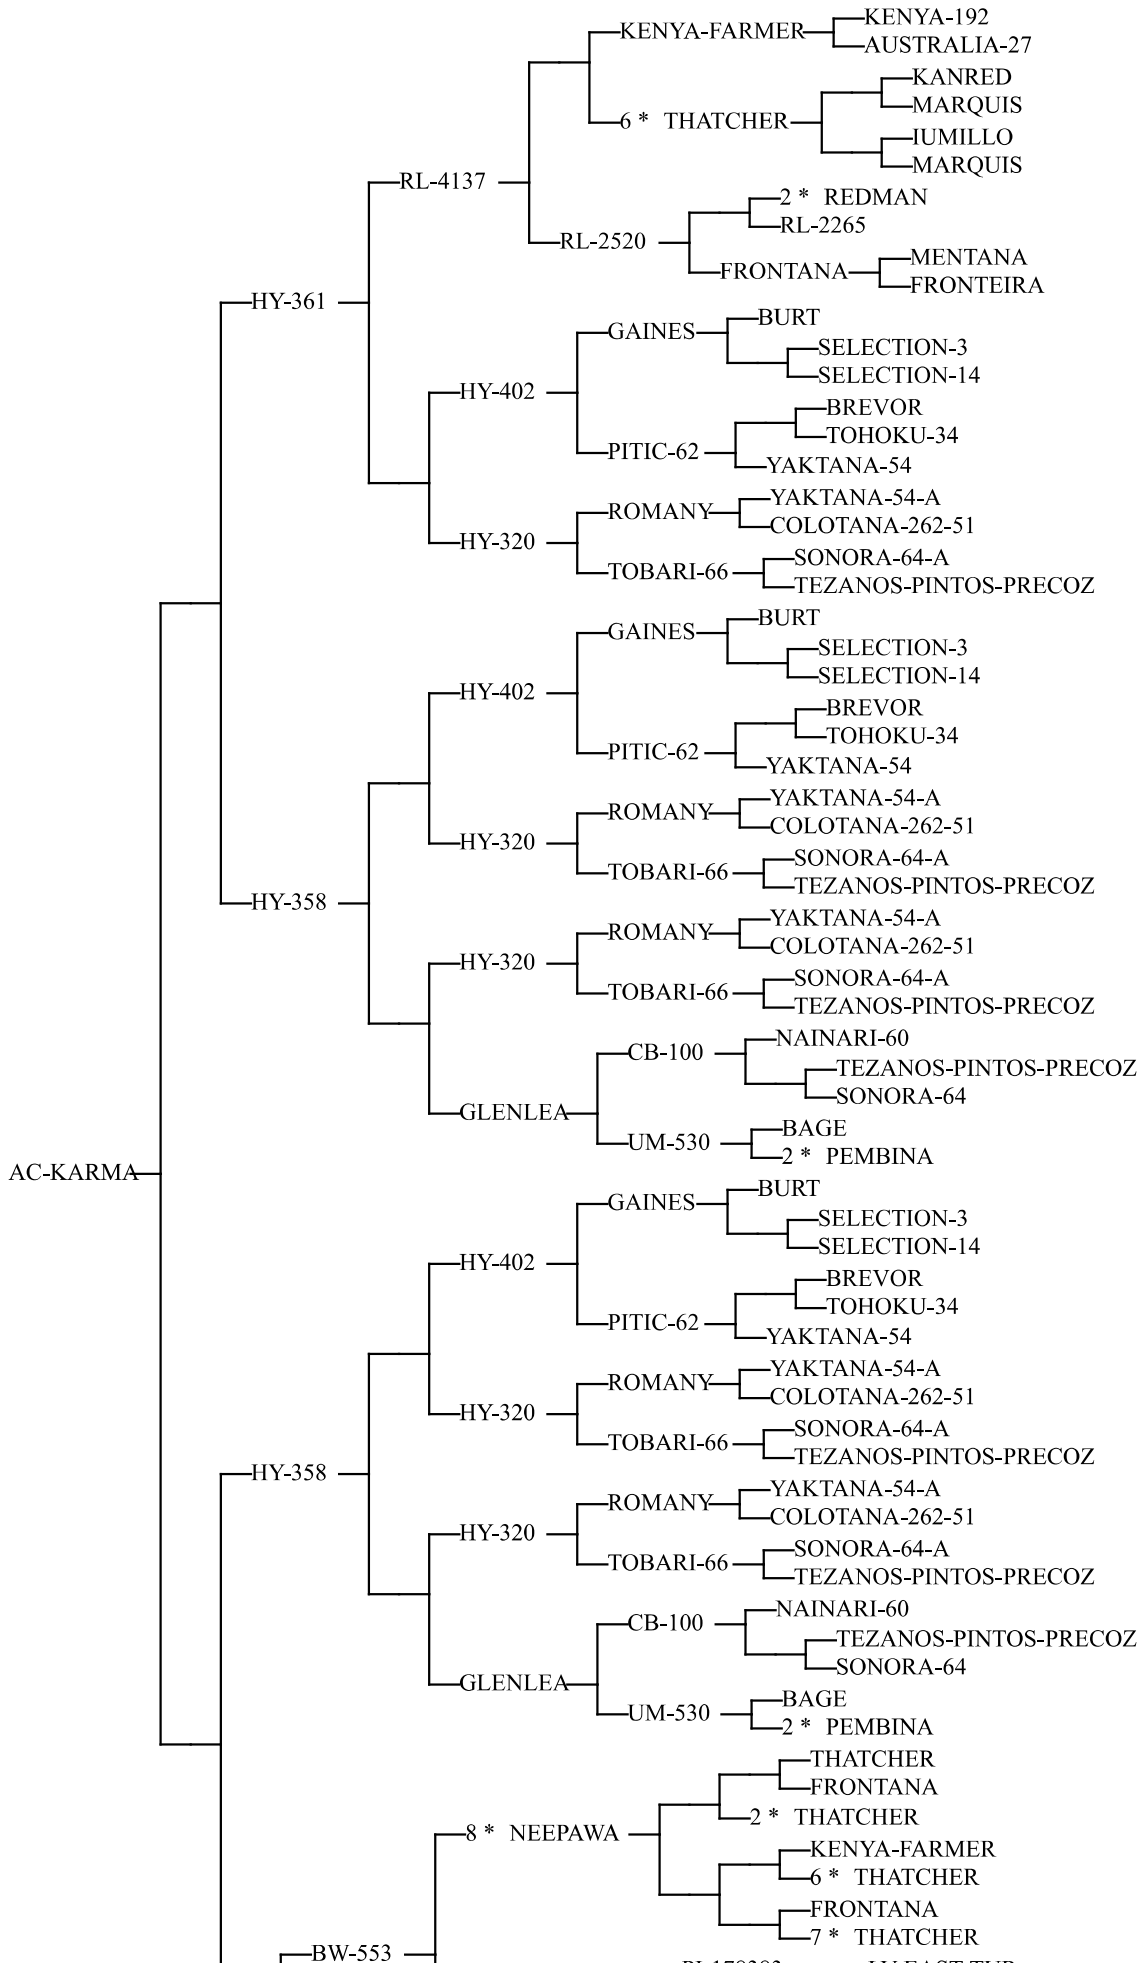

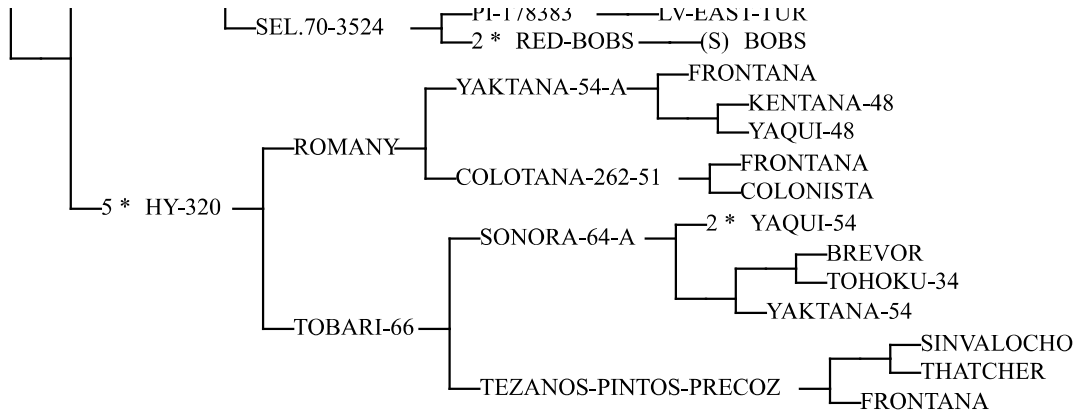

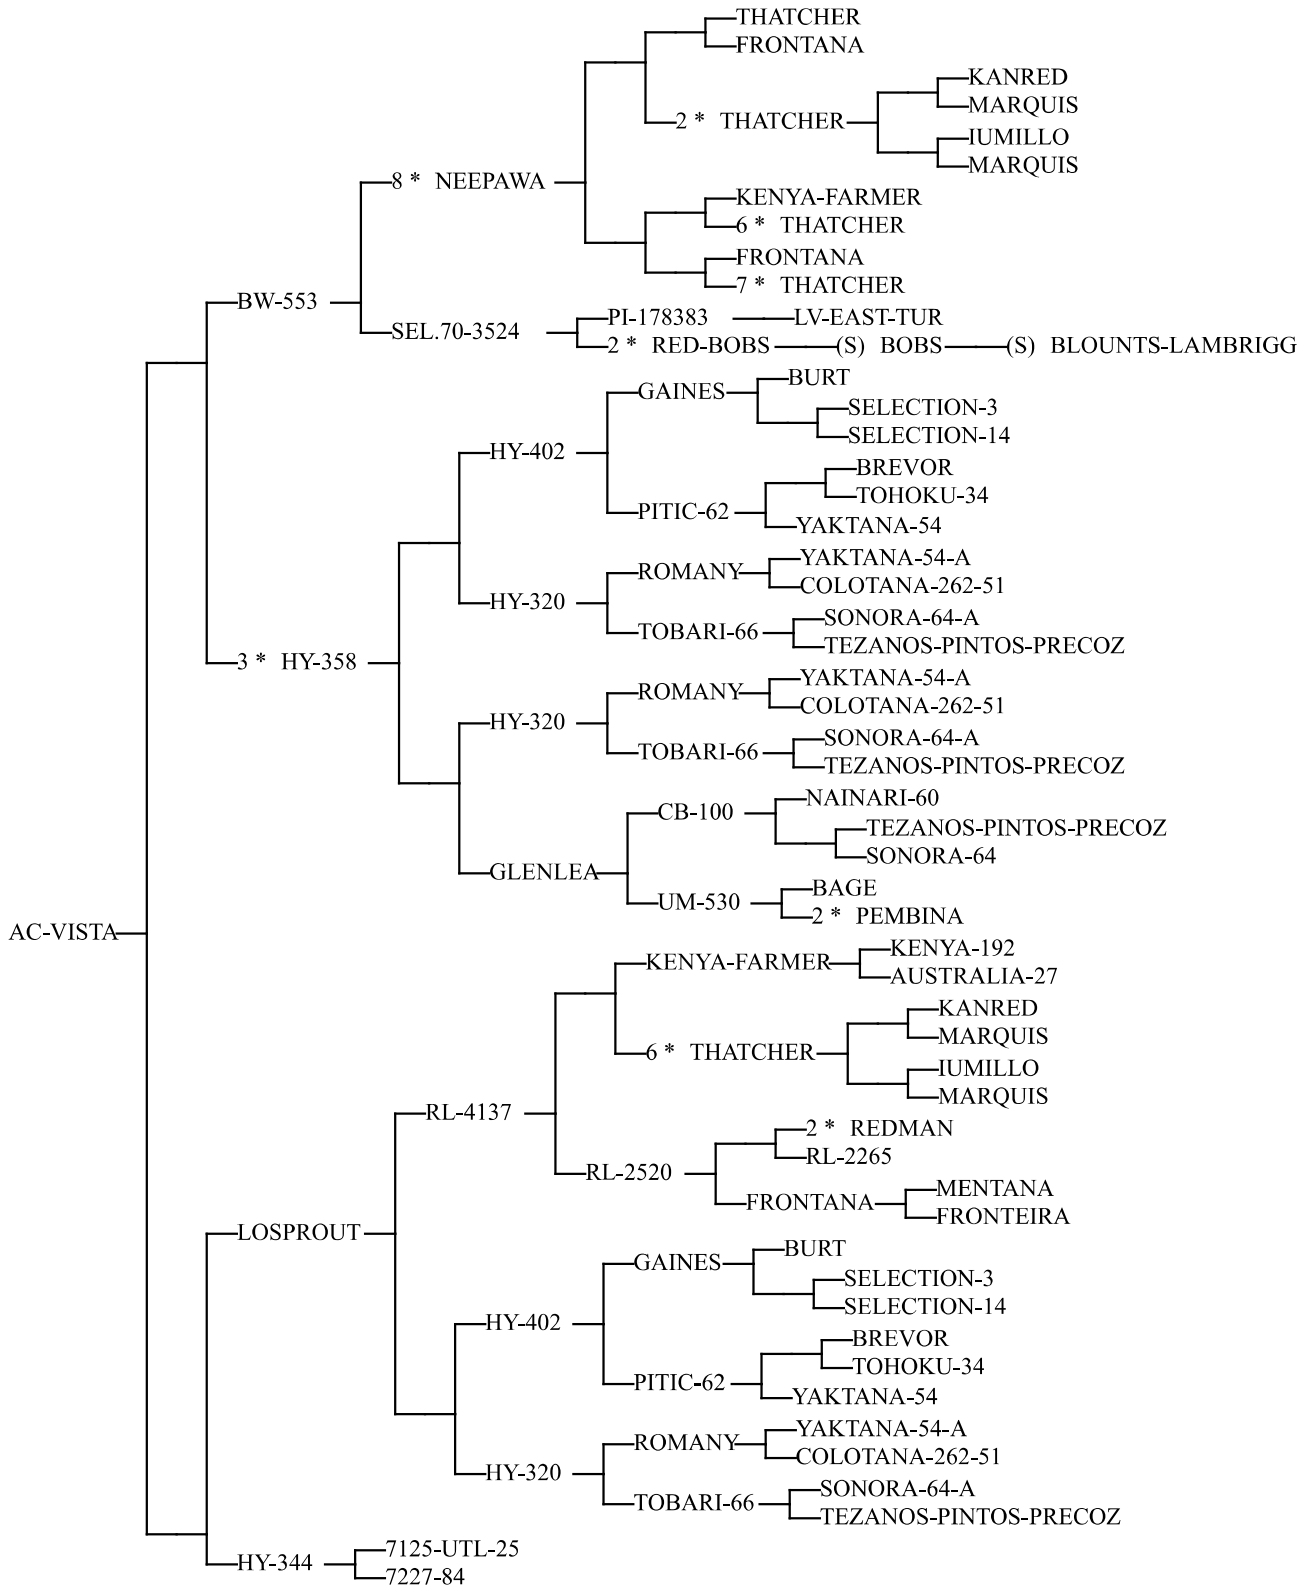

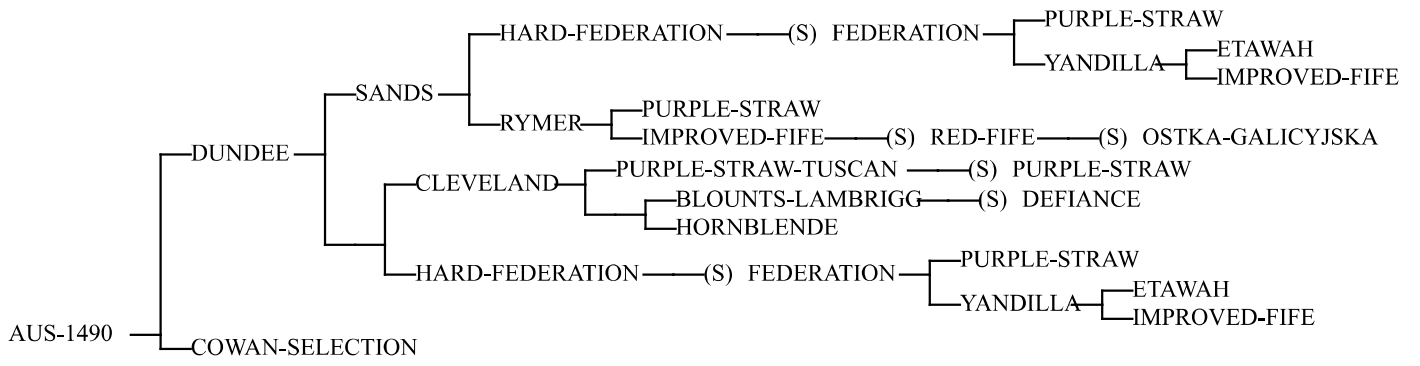

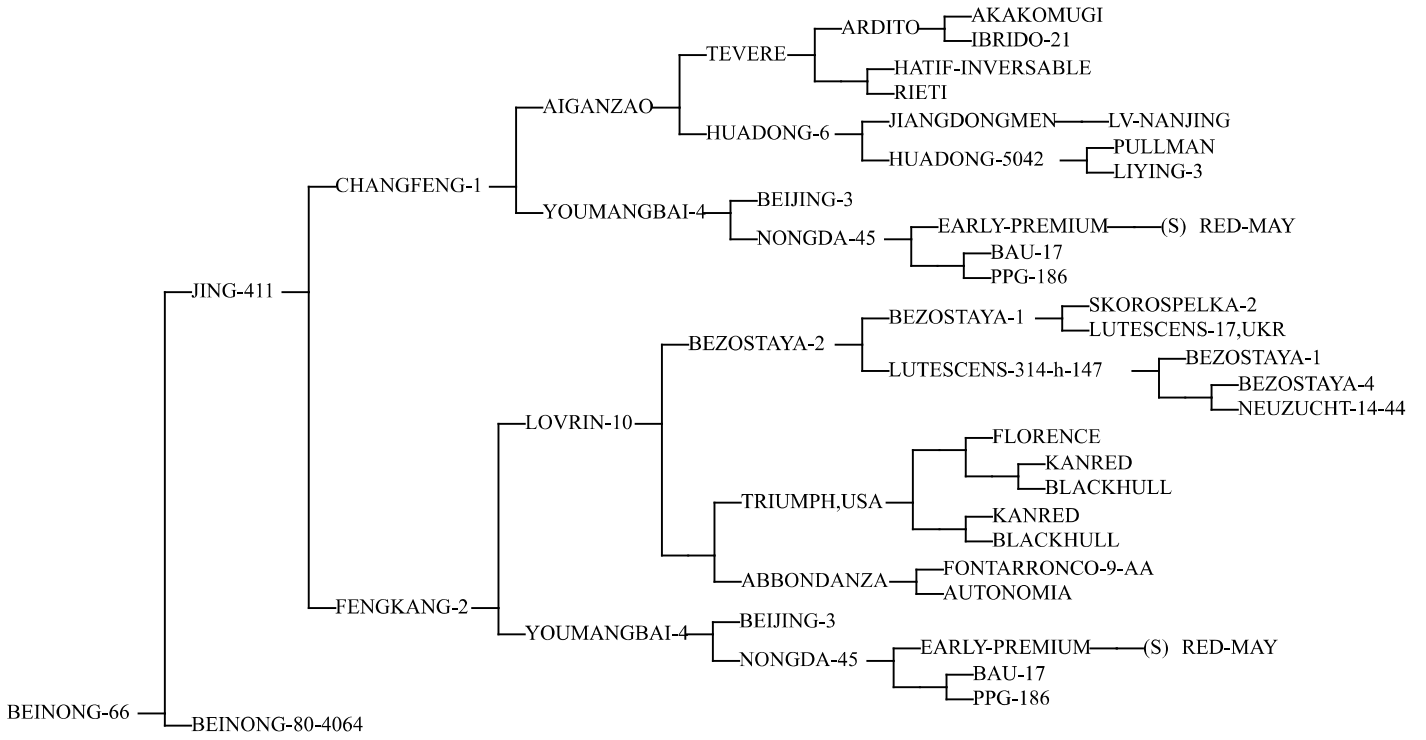



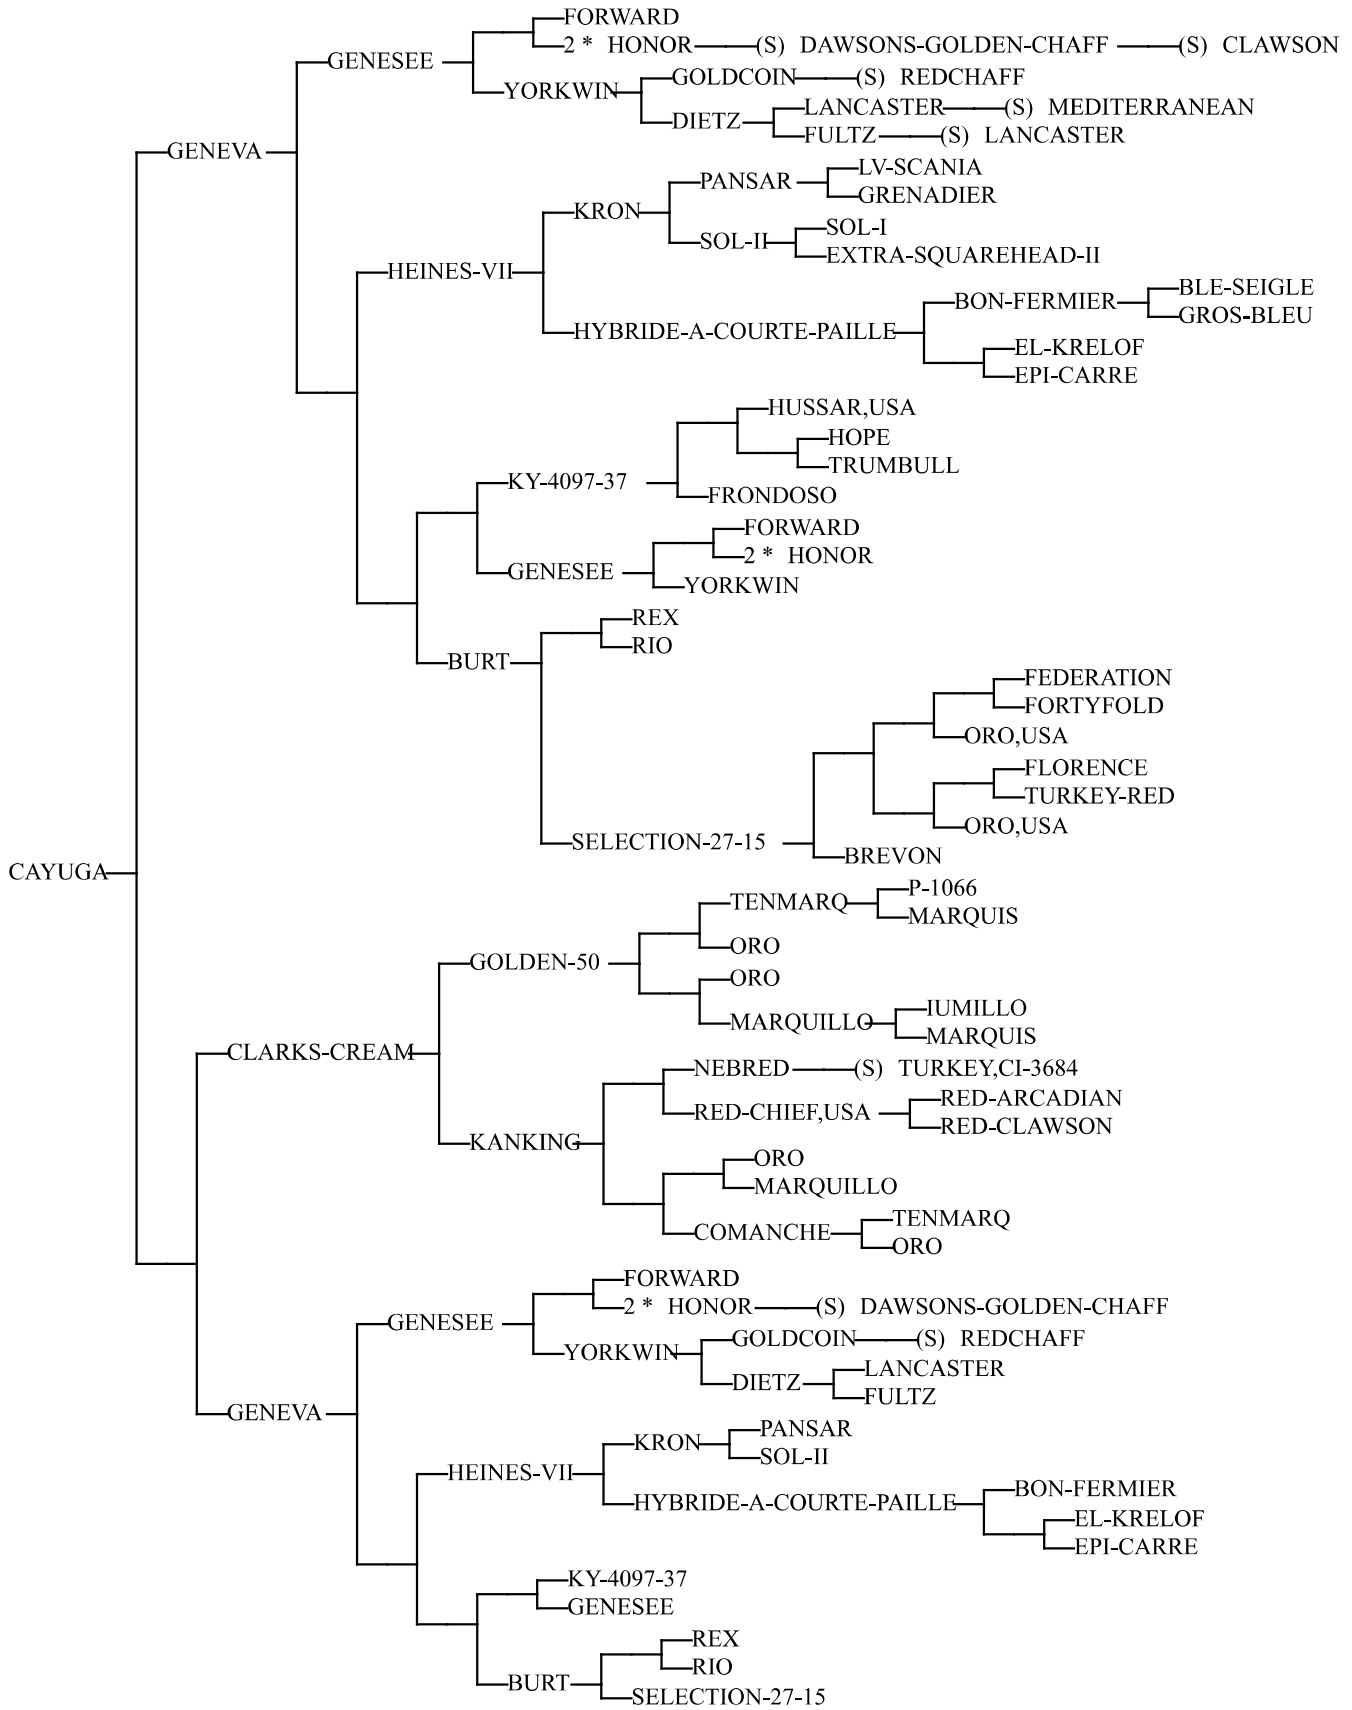

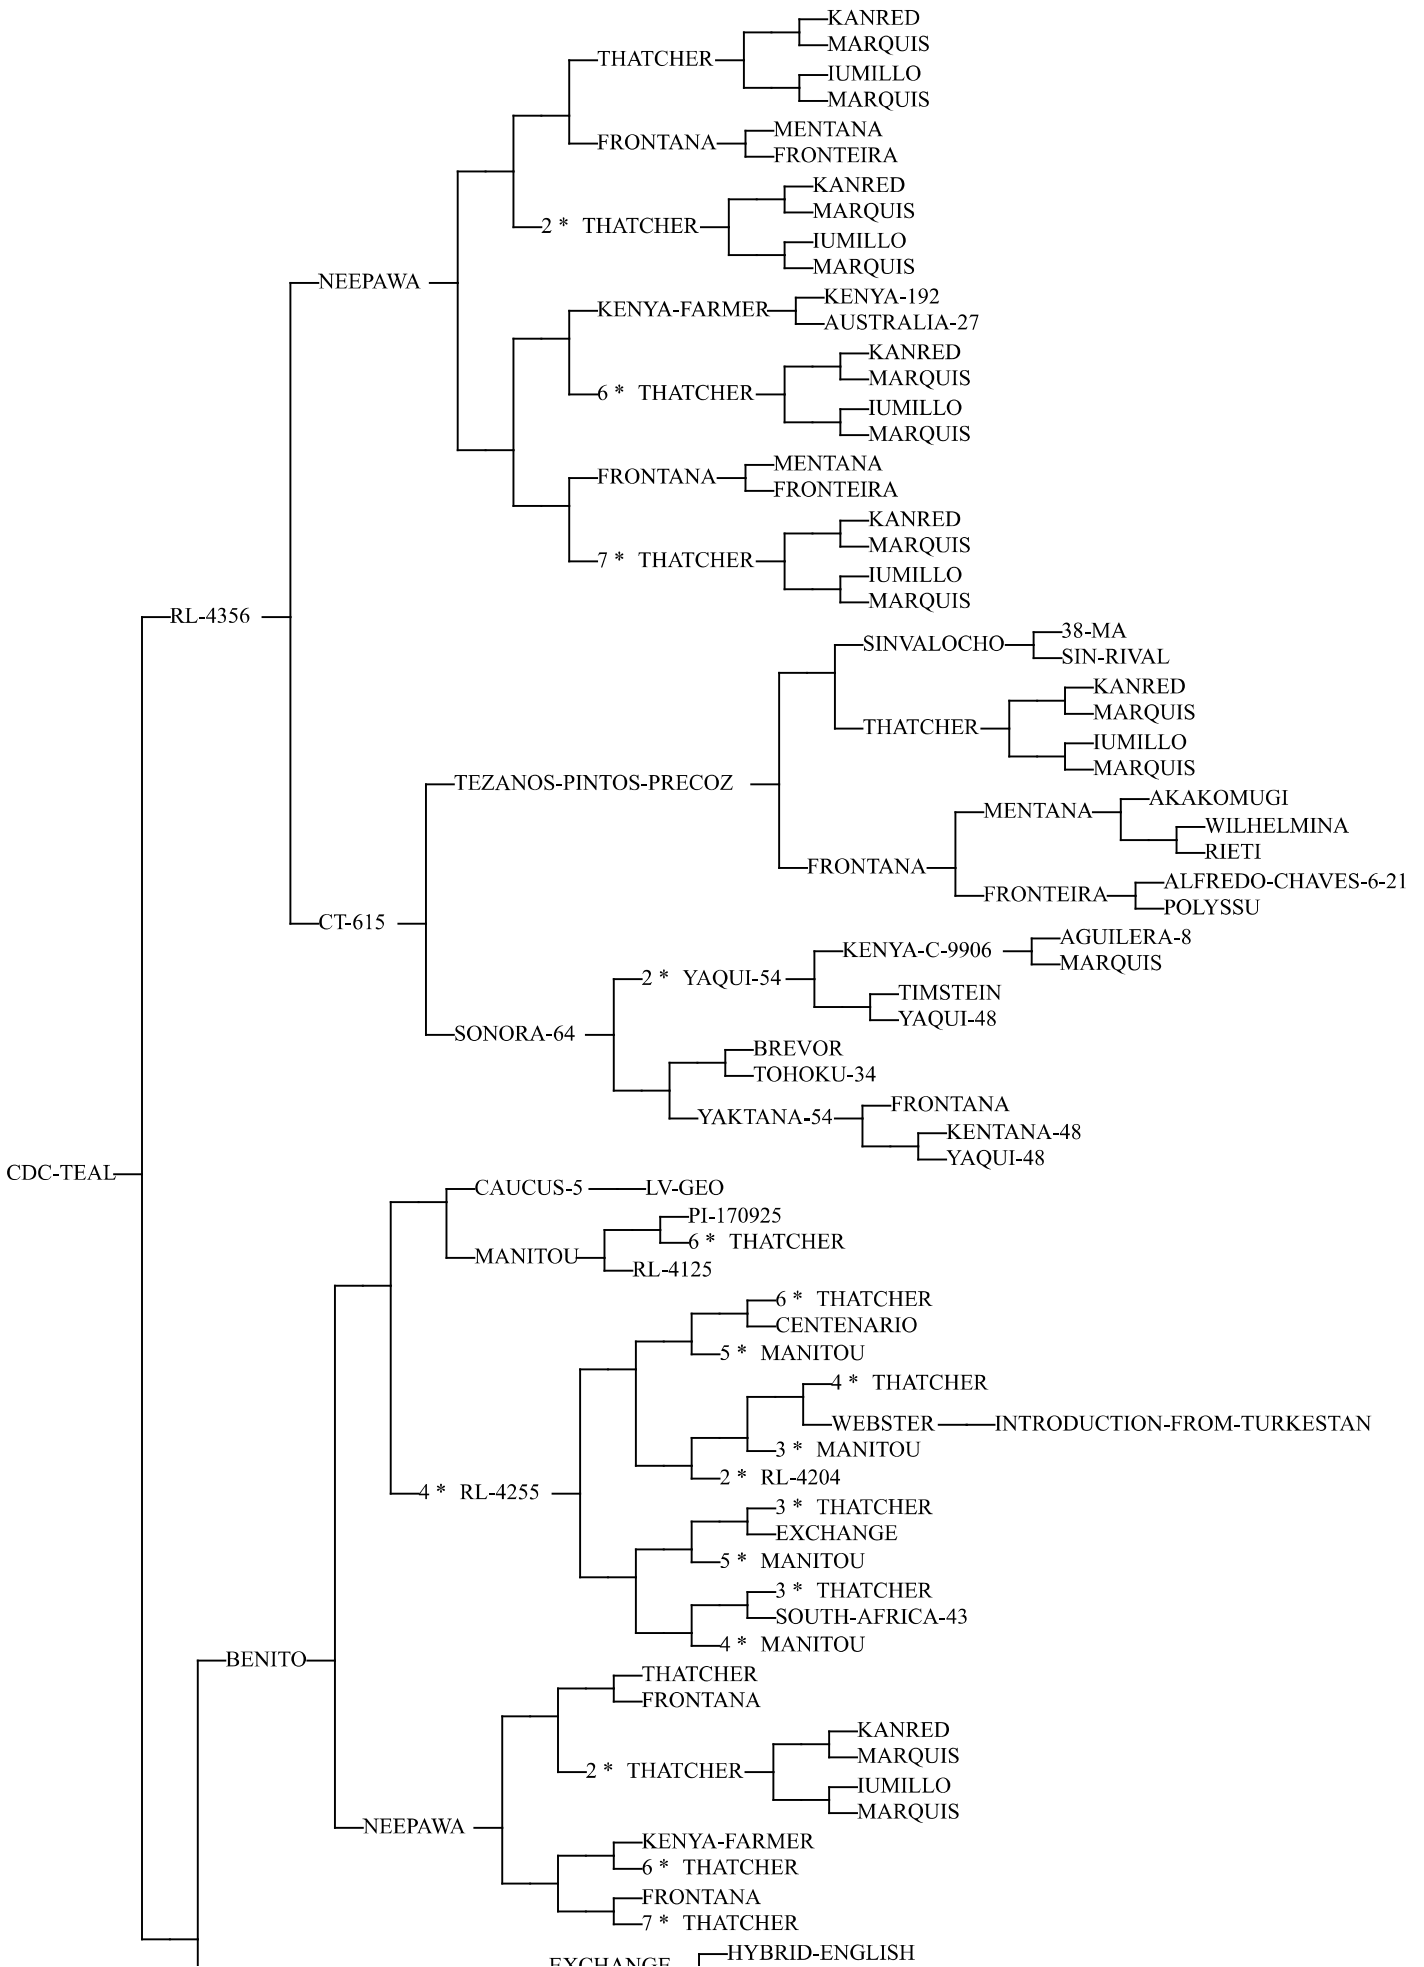

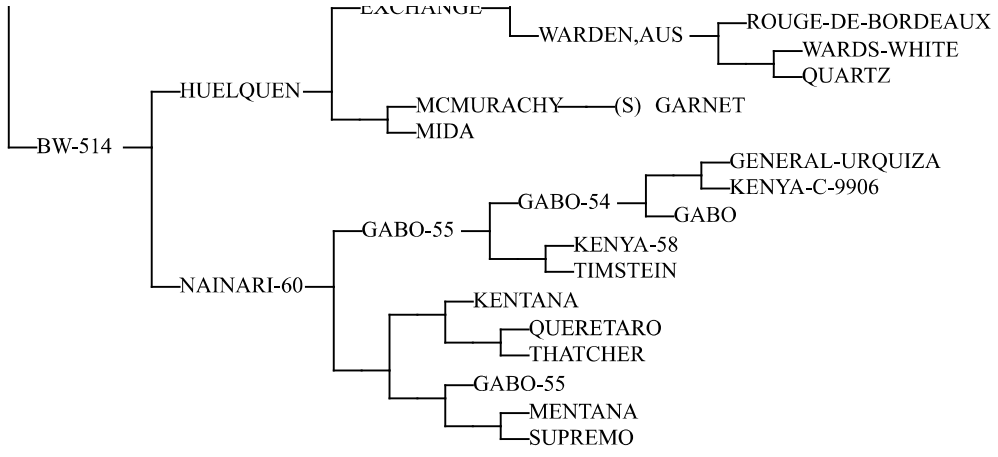

CHINESE-SPRING ———LV-WEST-SZECHUAN

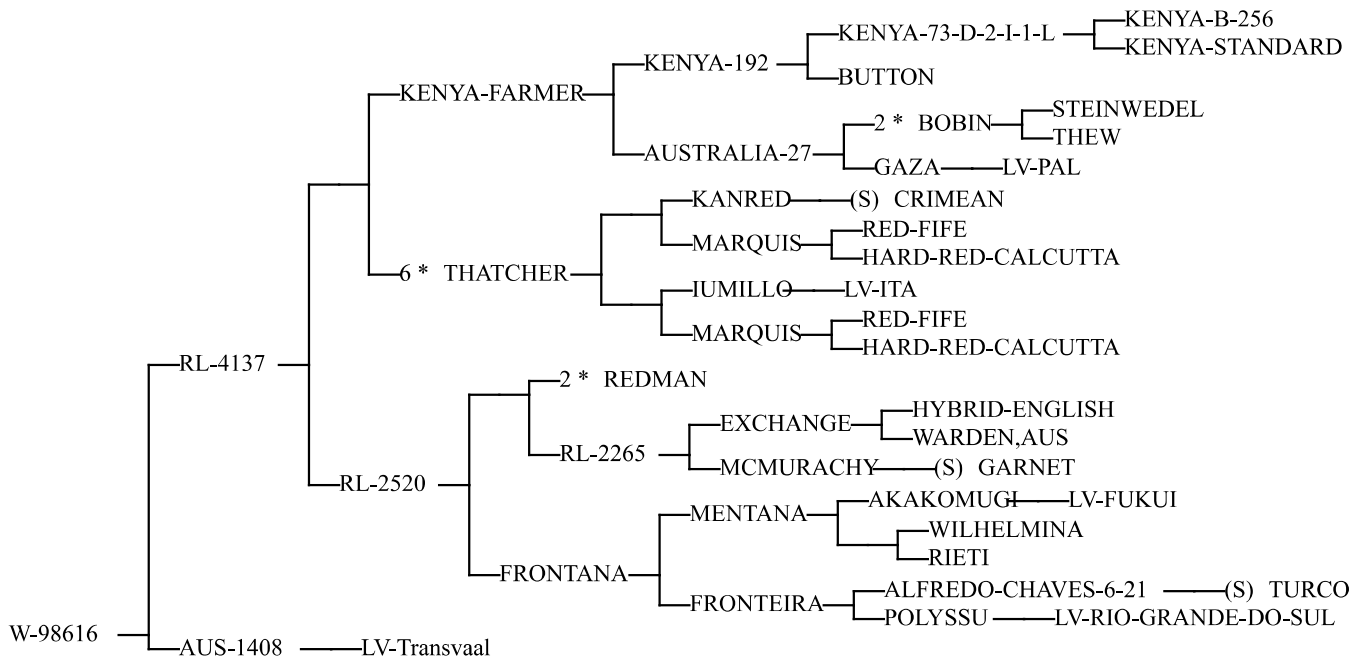

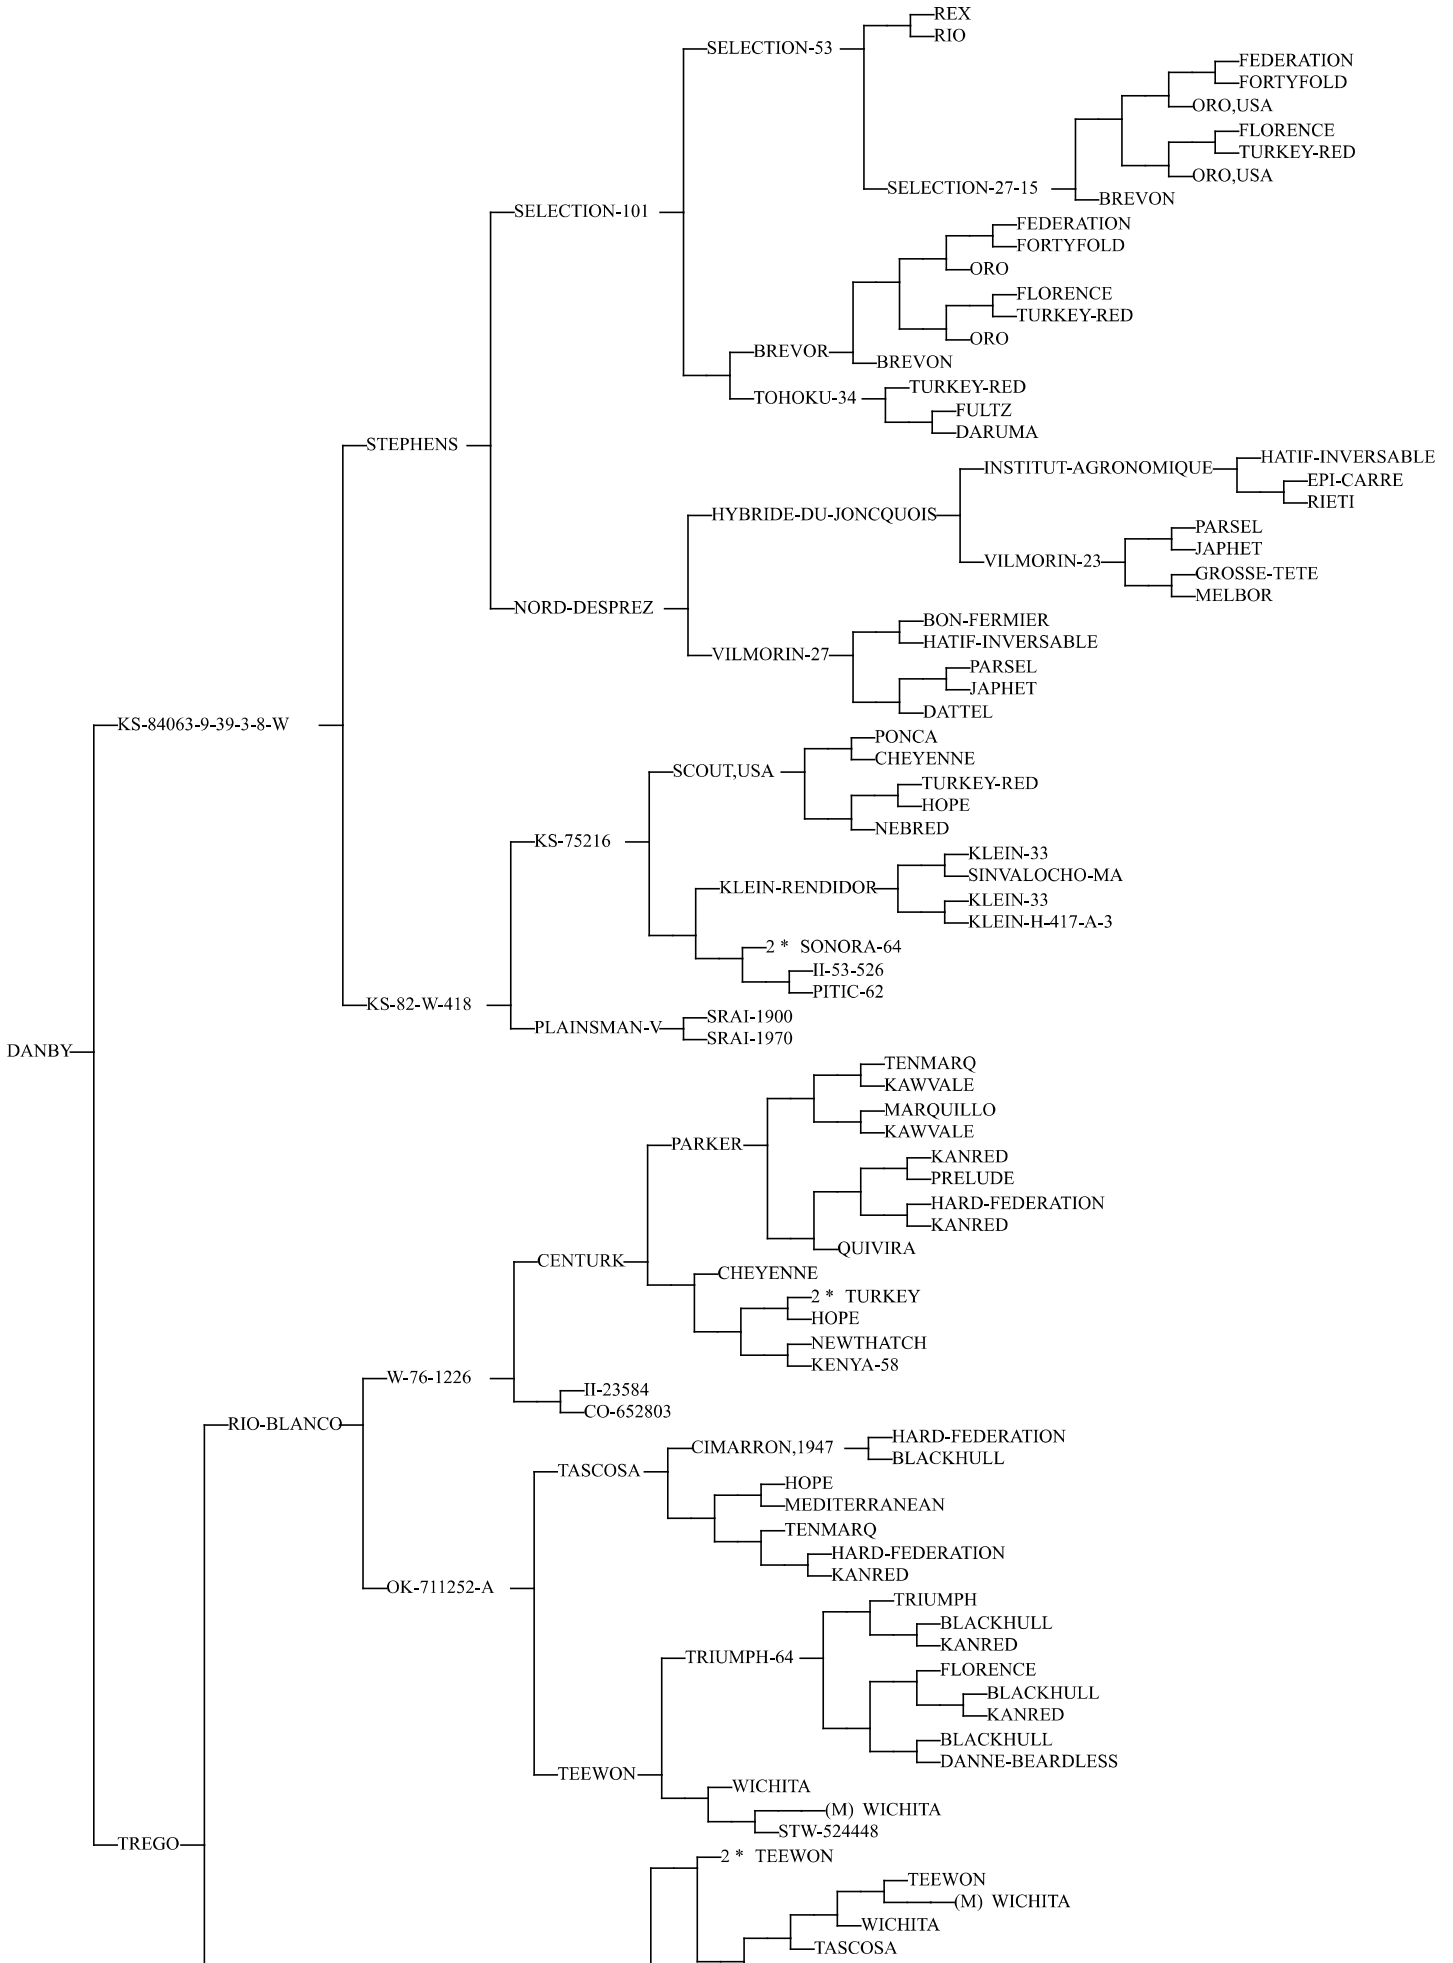

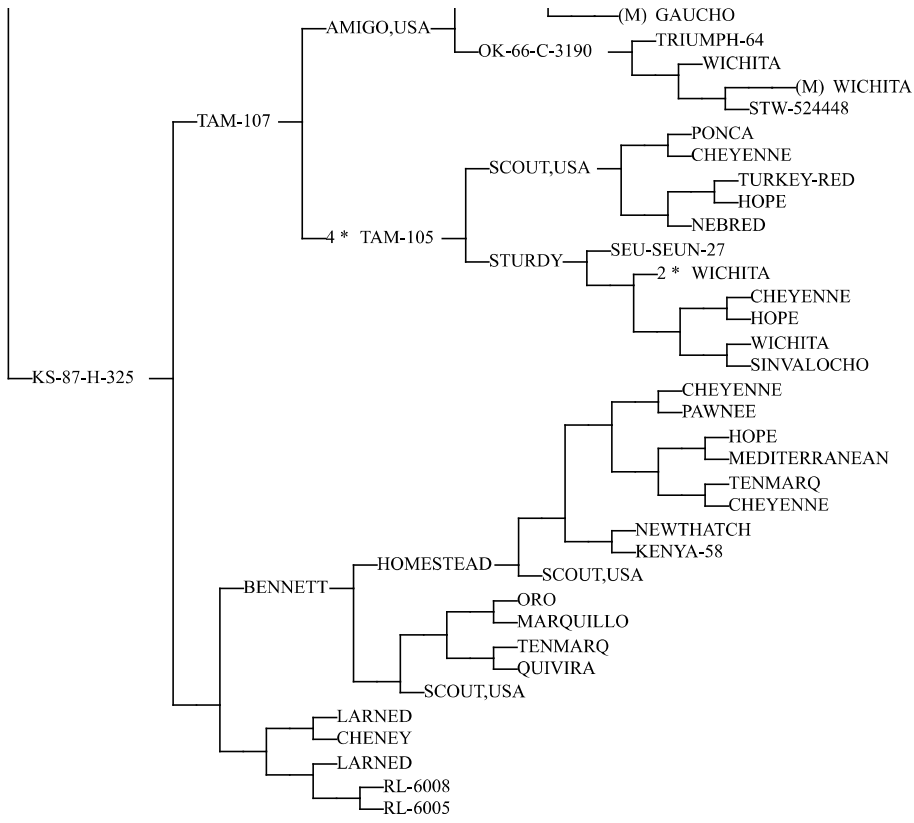

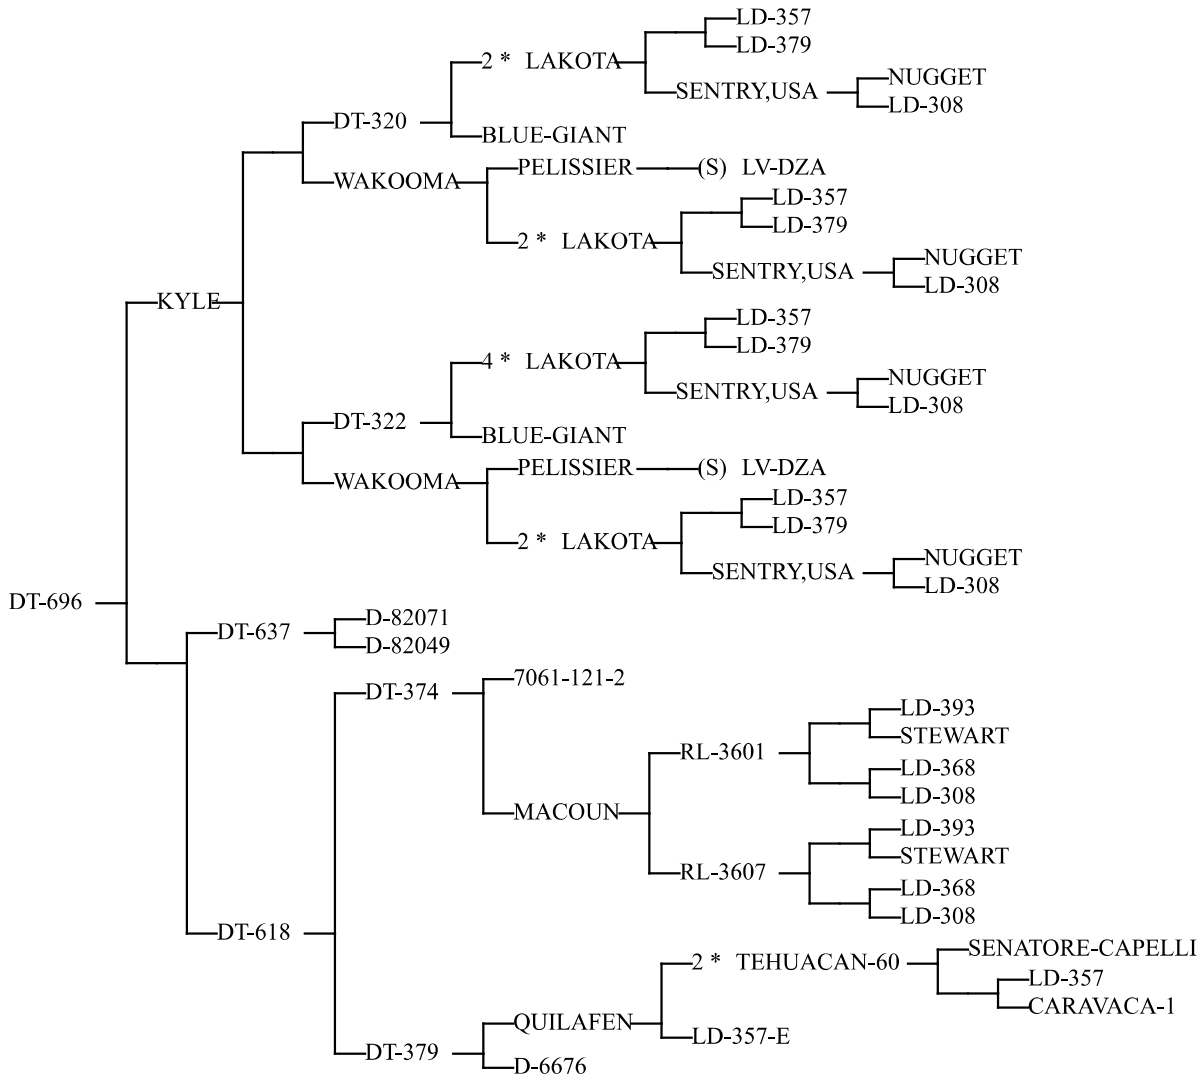



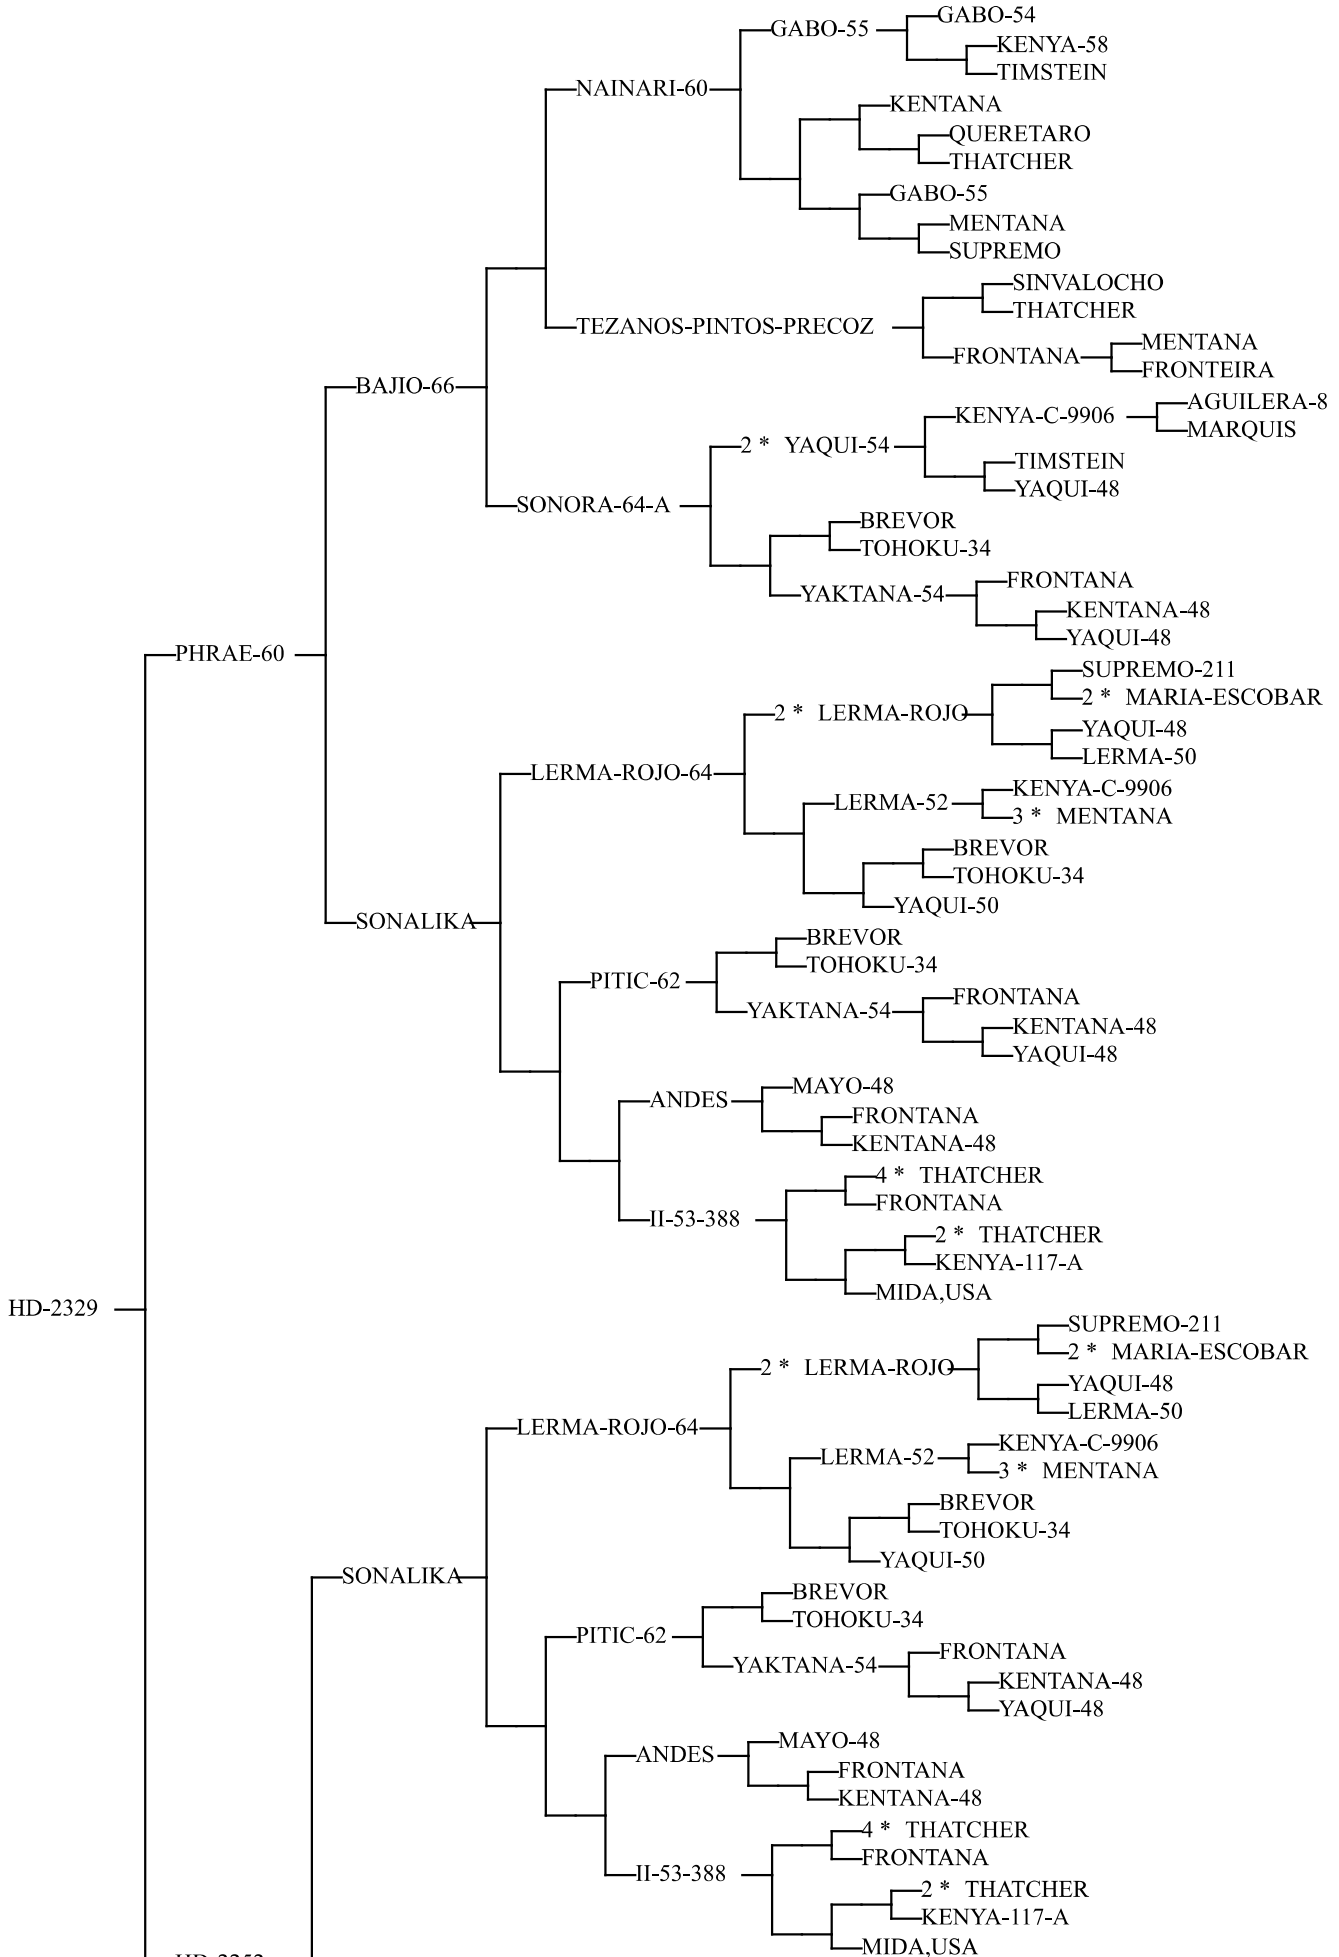

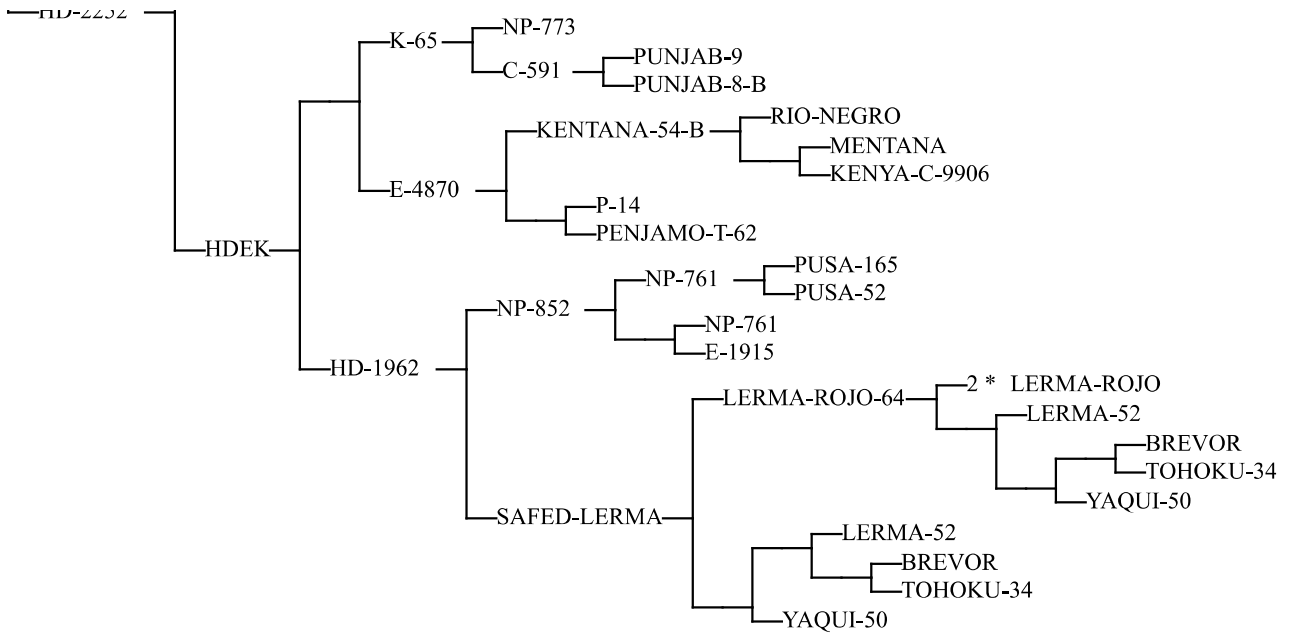

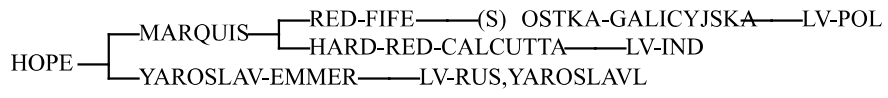

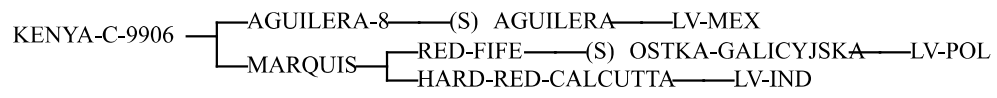

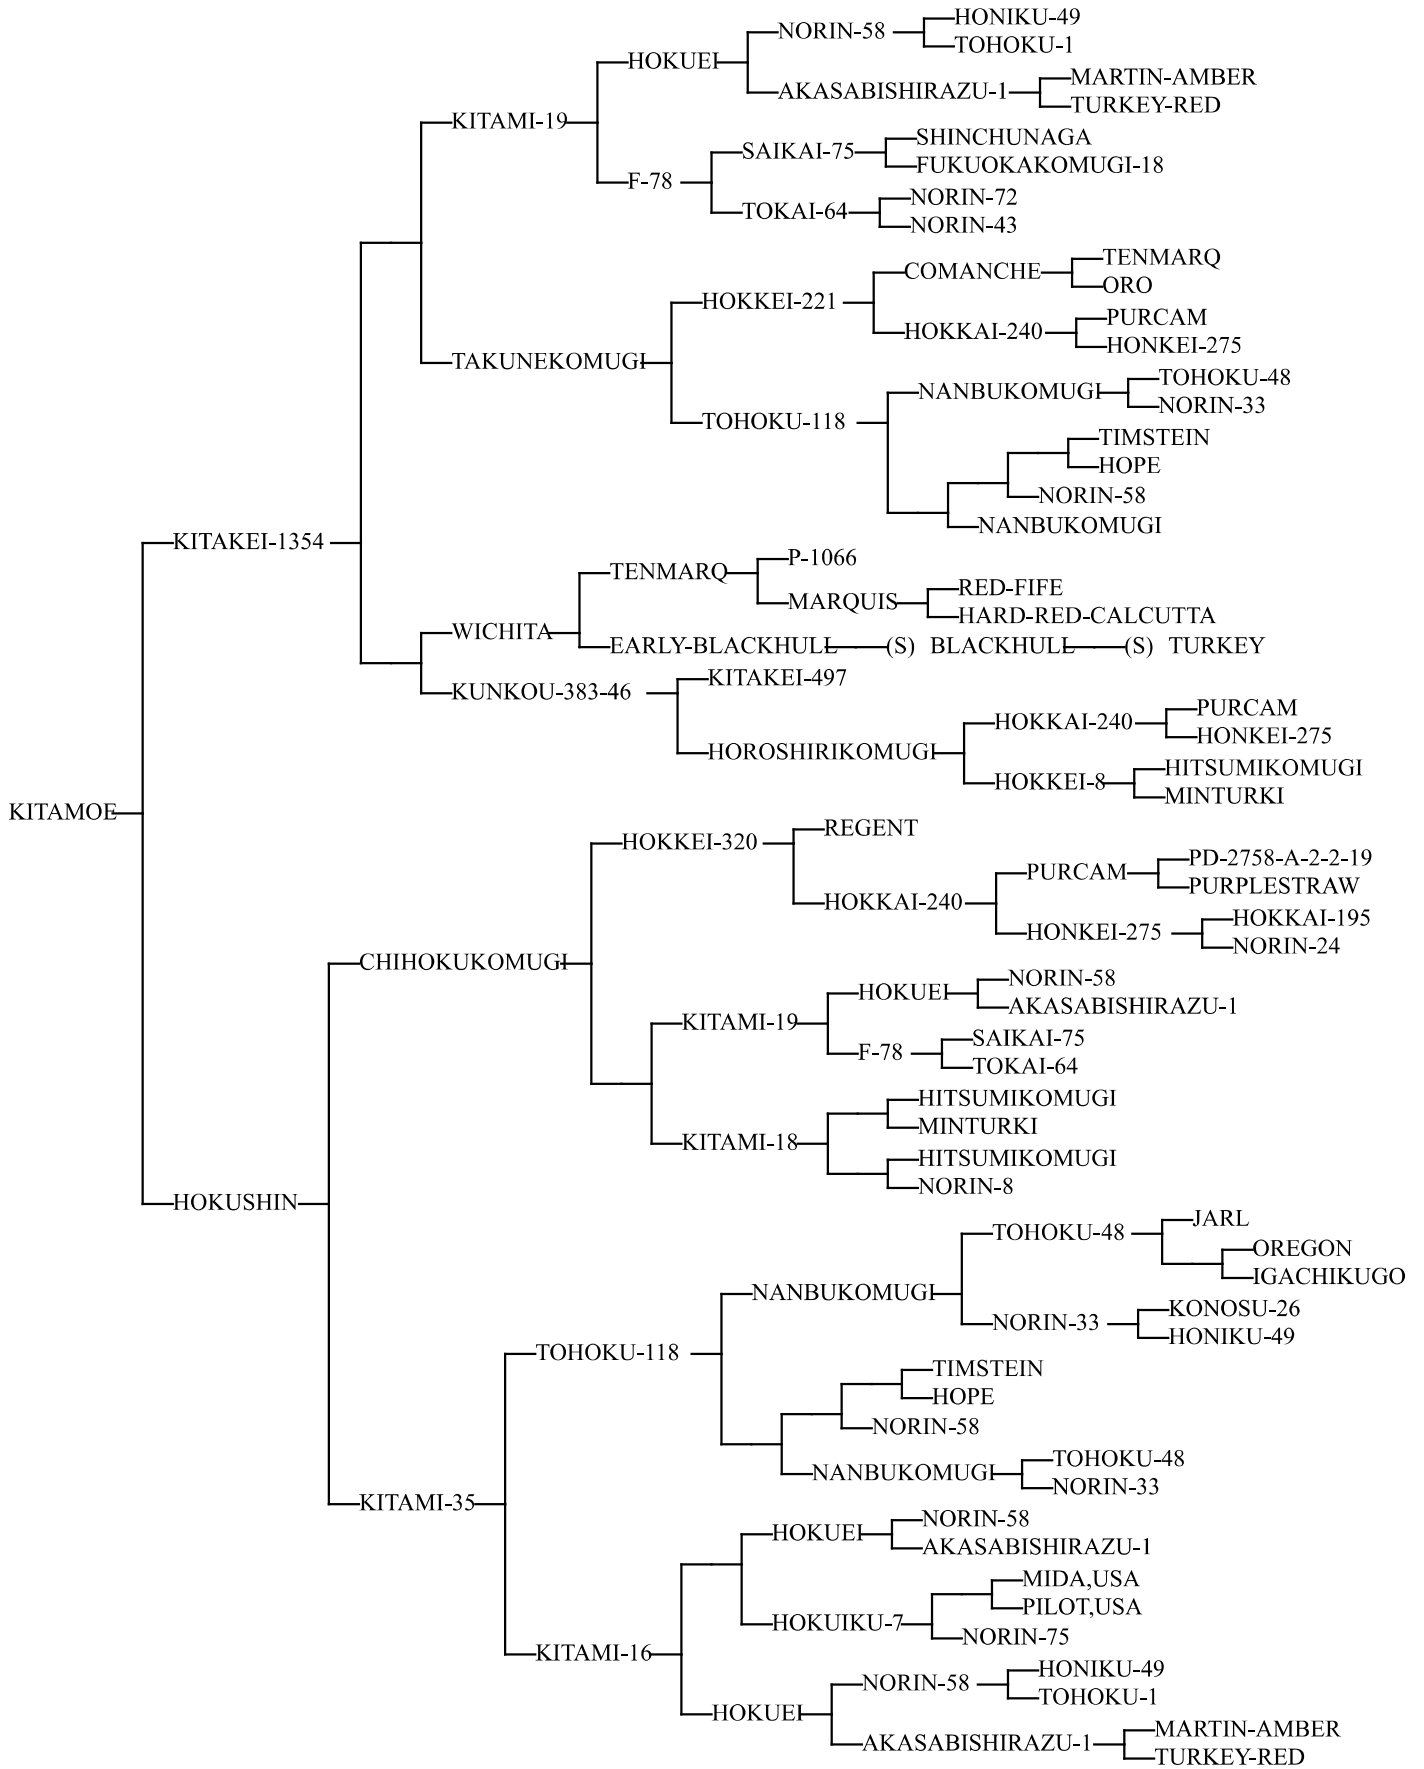

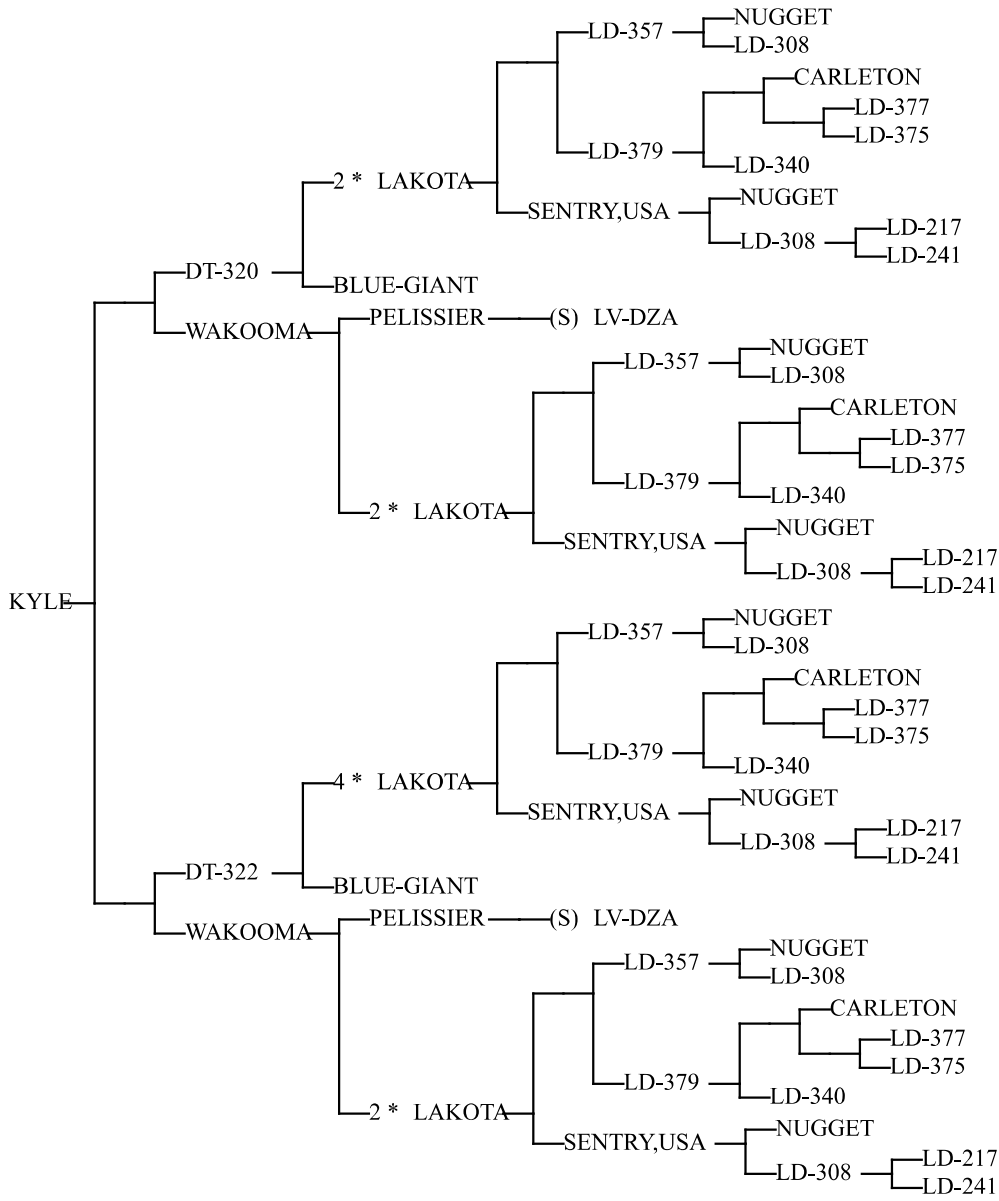

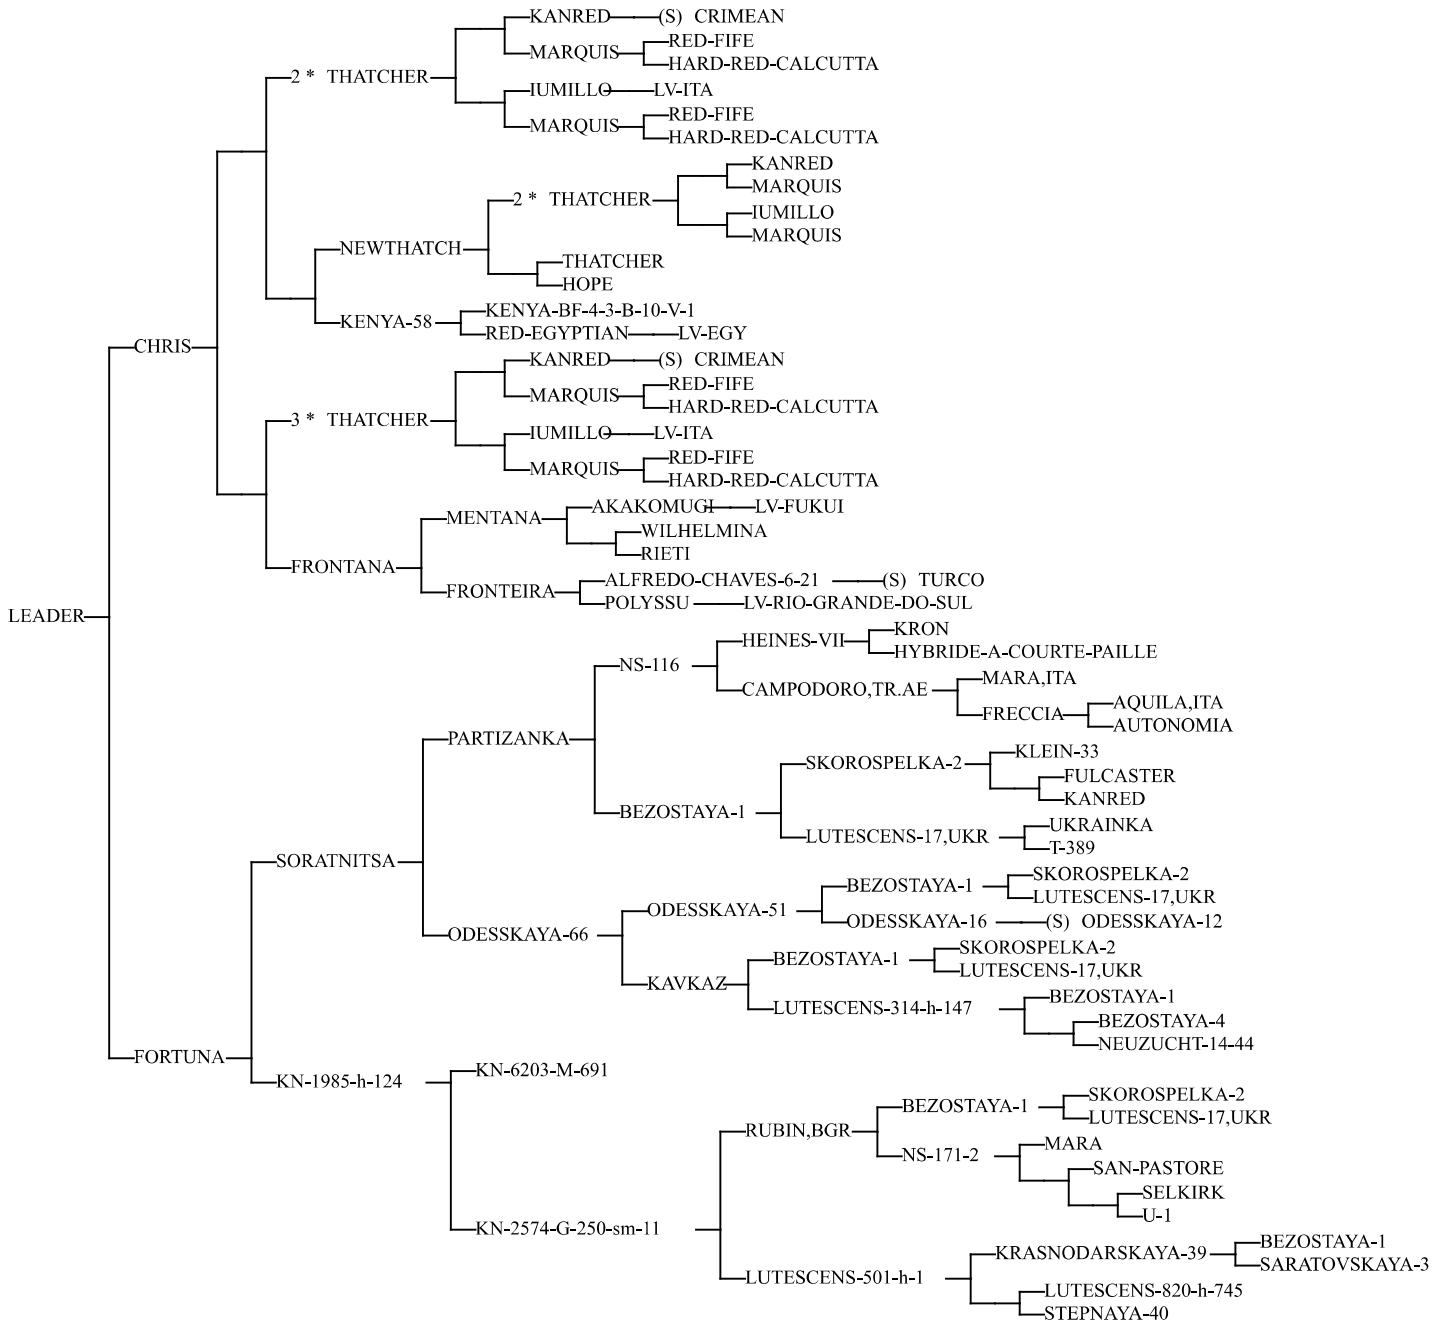

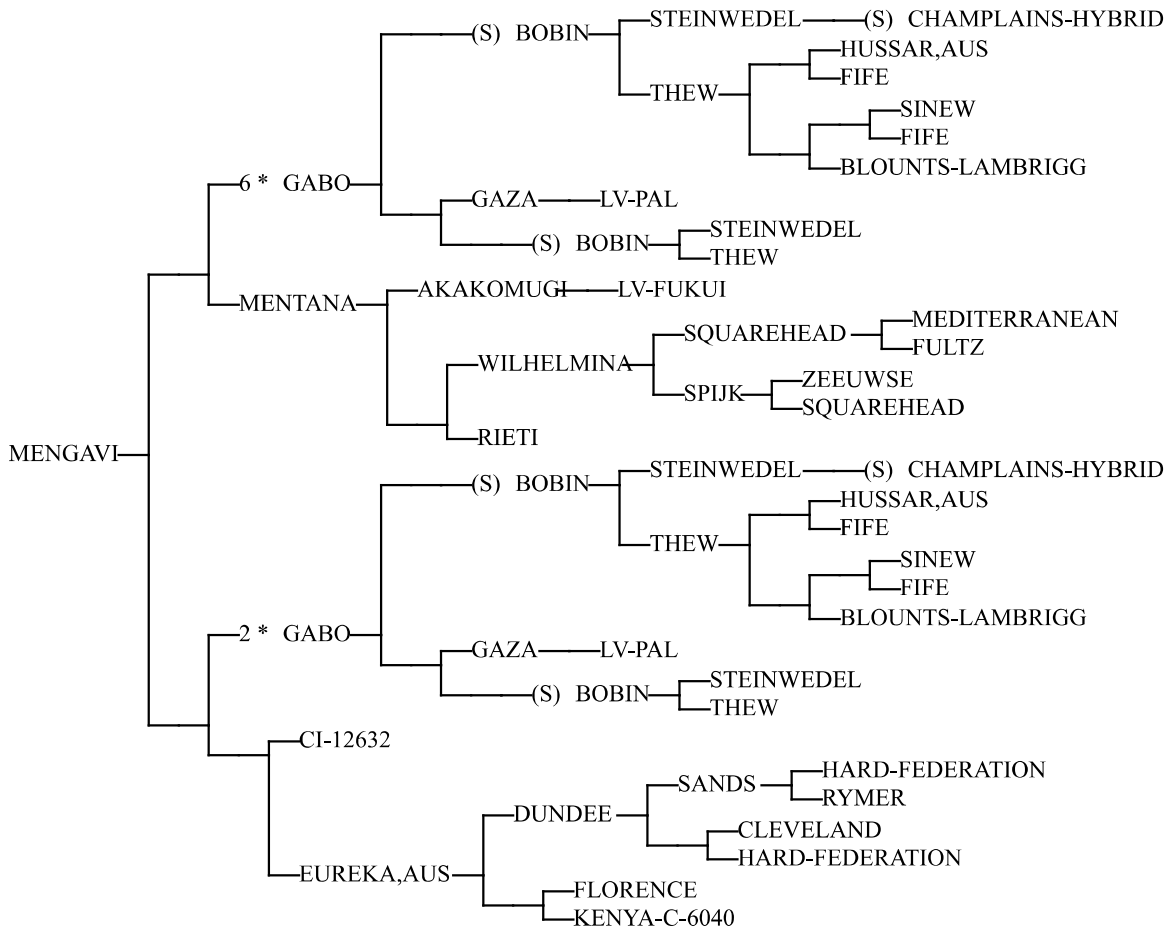



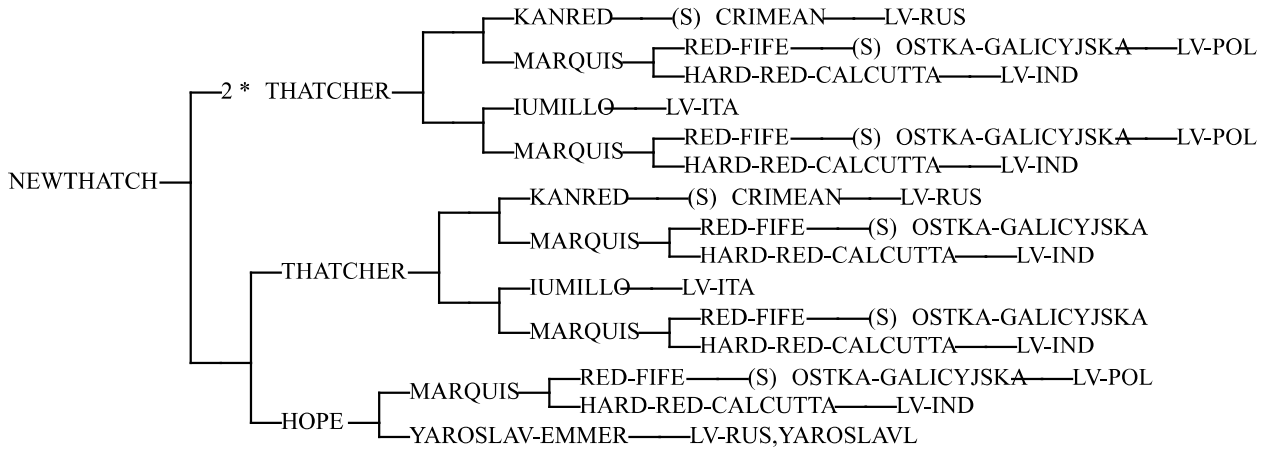

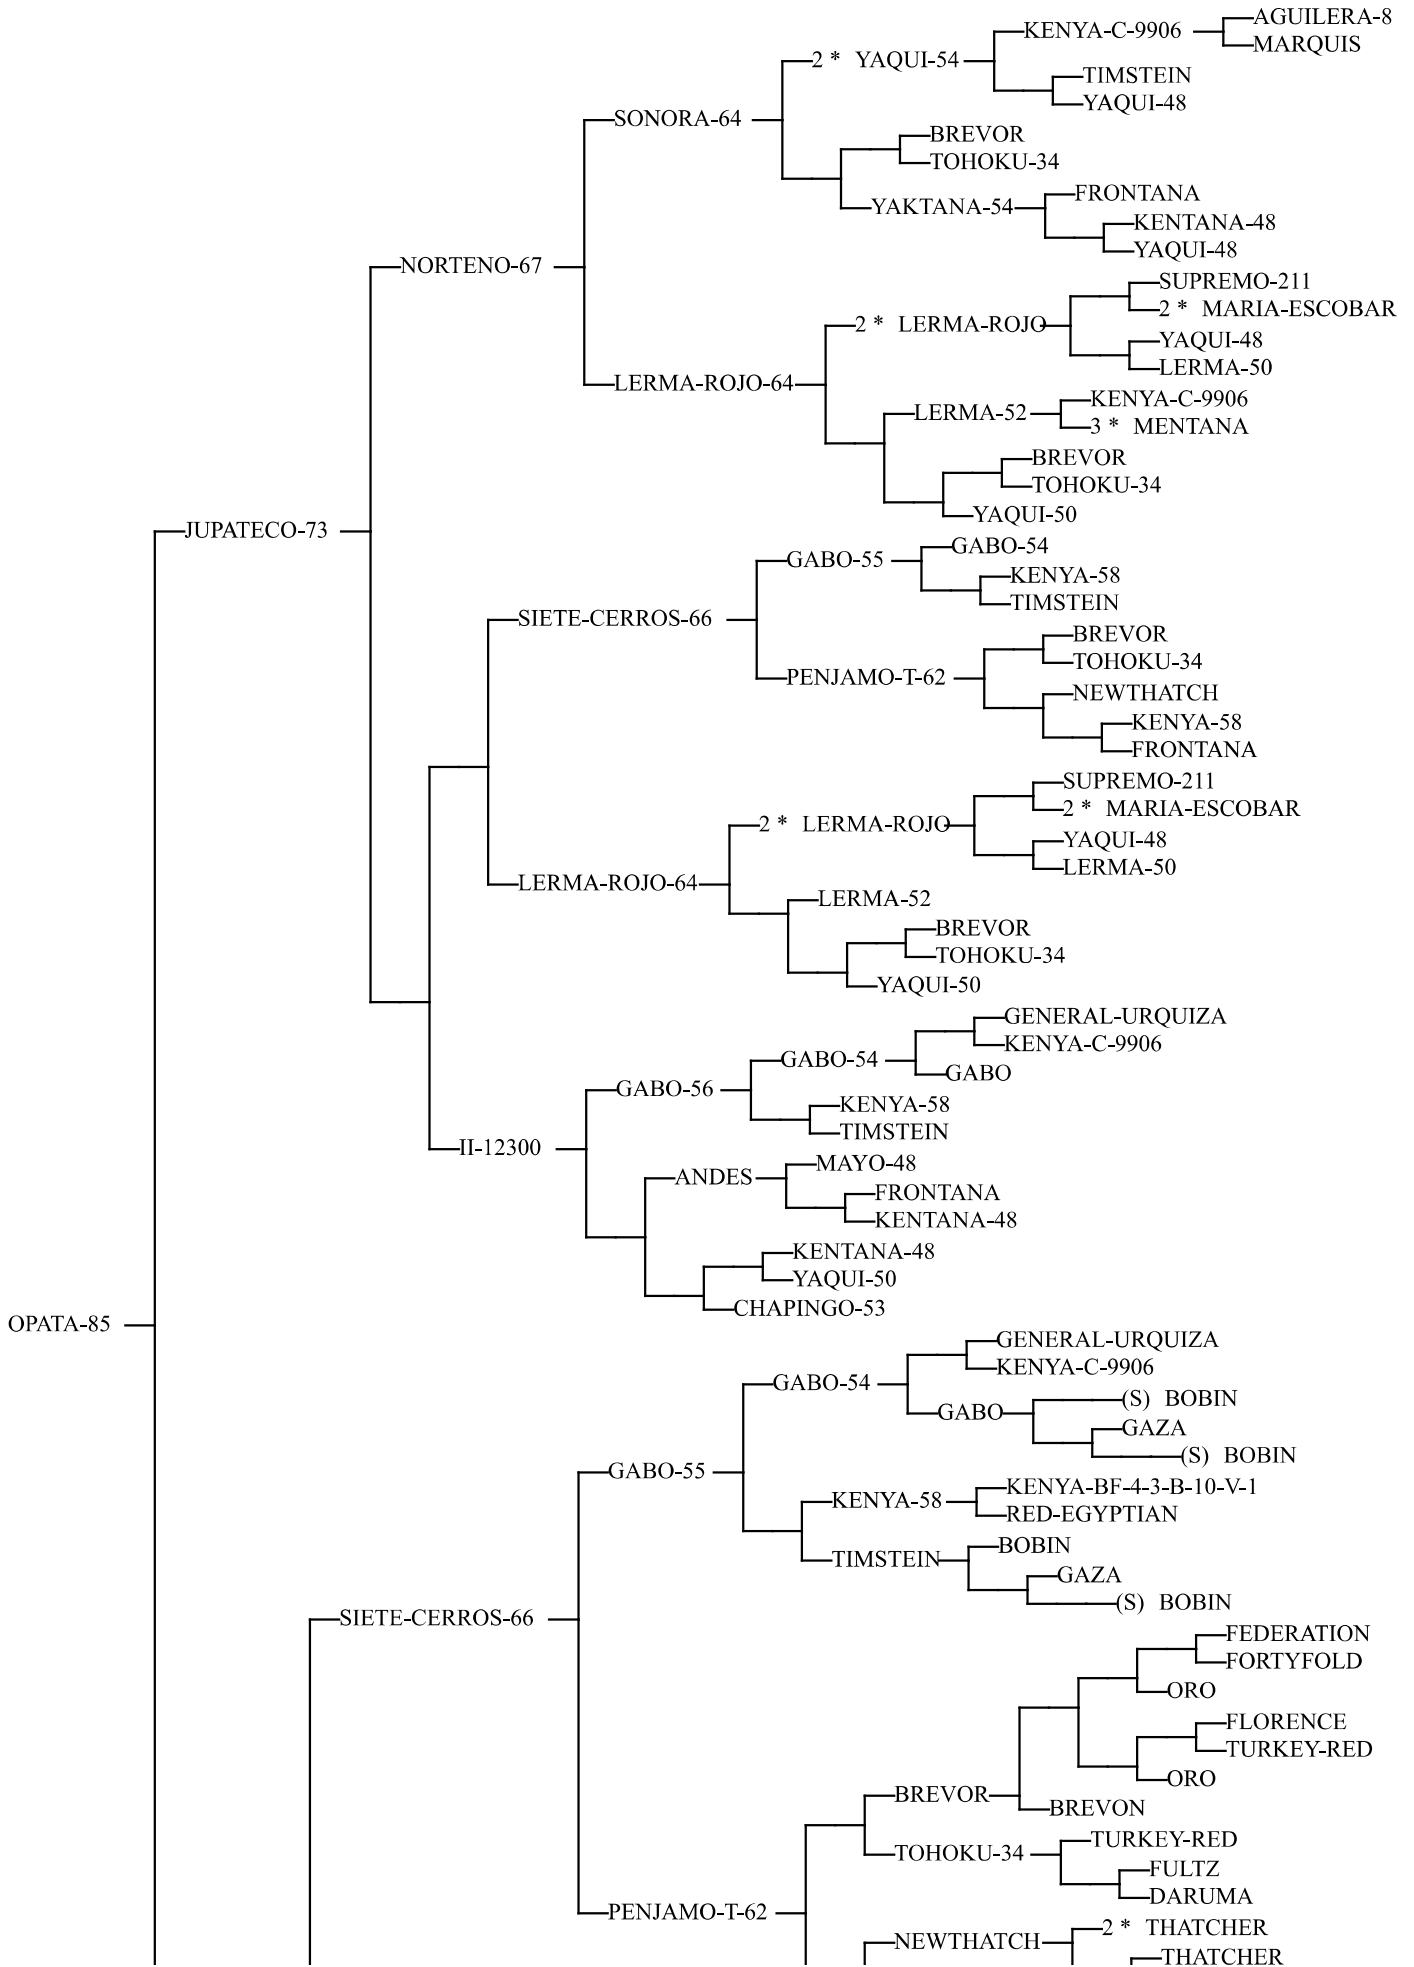

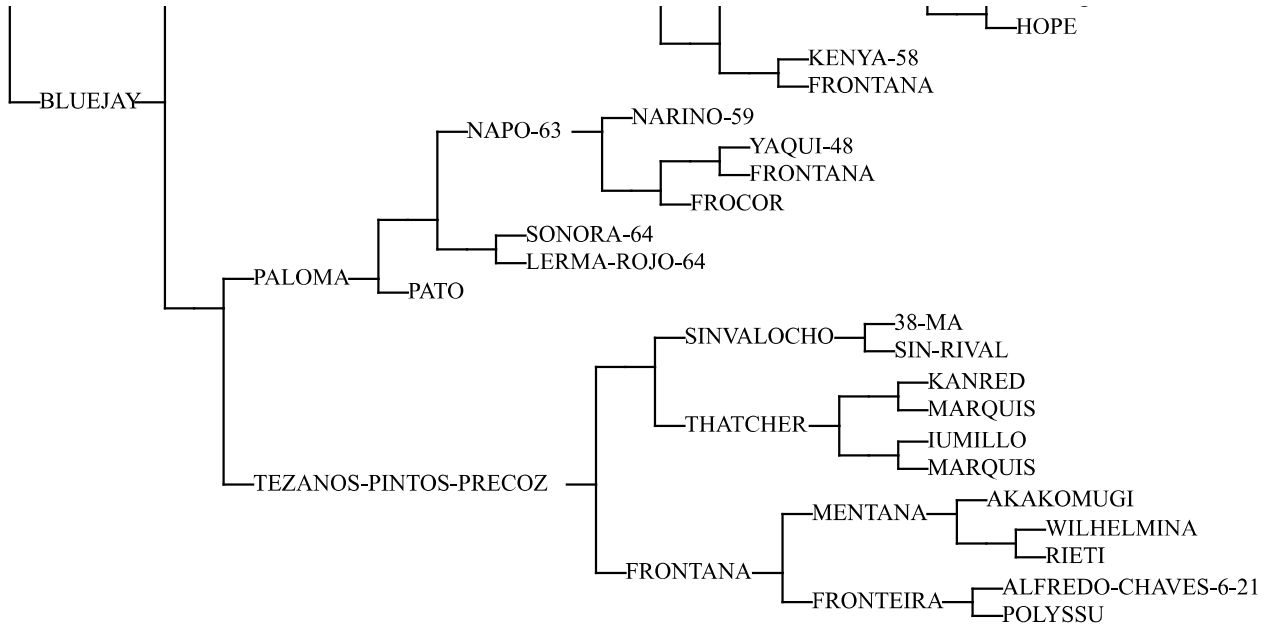

OS21-5:  
Tordo/Zenkojikomugi  
or  
Tordo/Zenkoji

Osanai et al. 2015

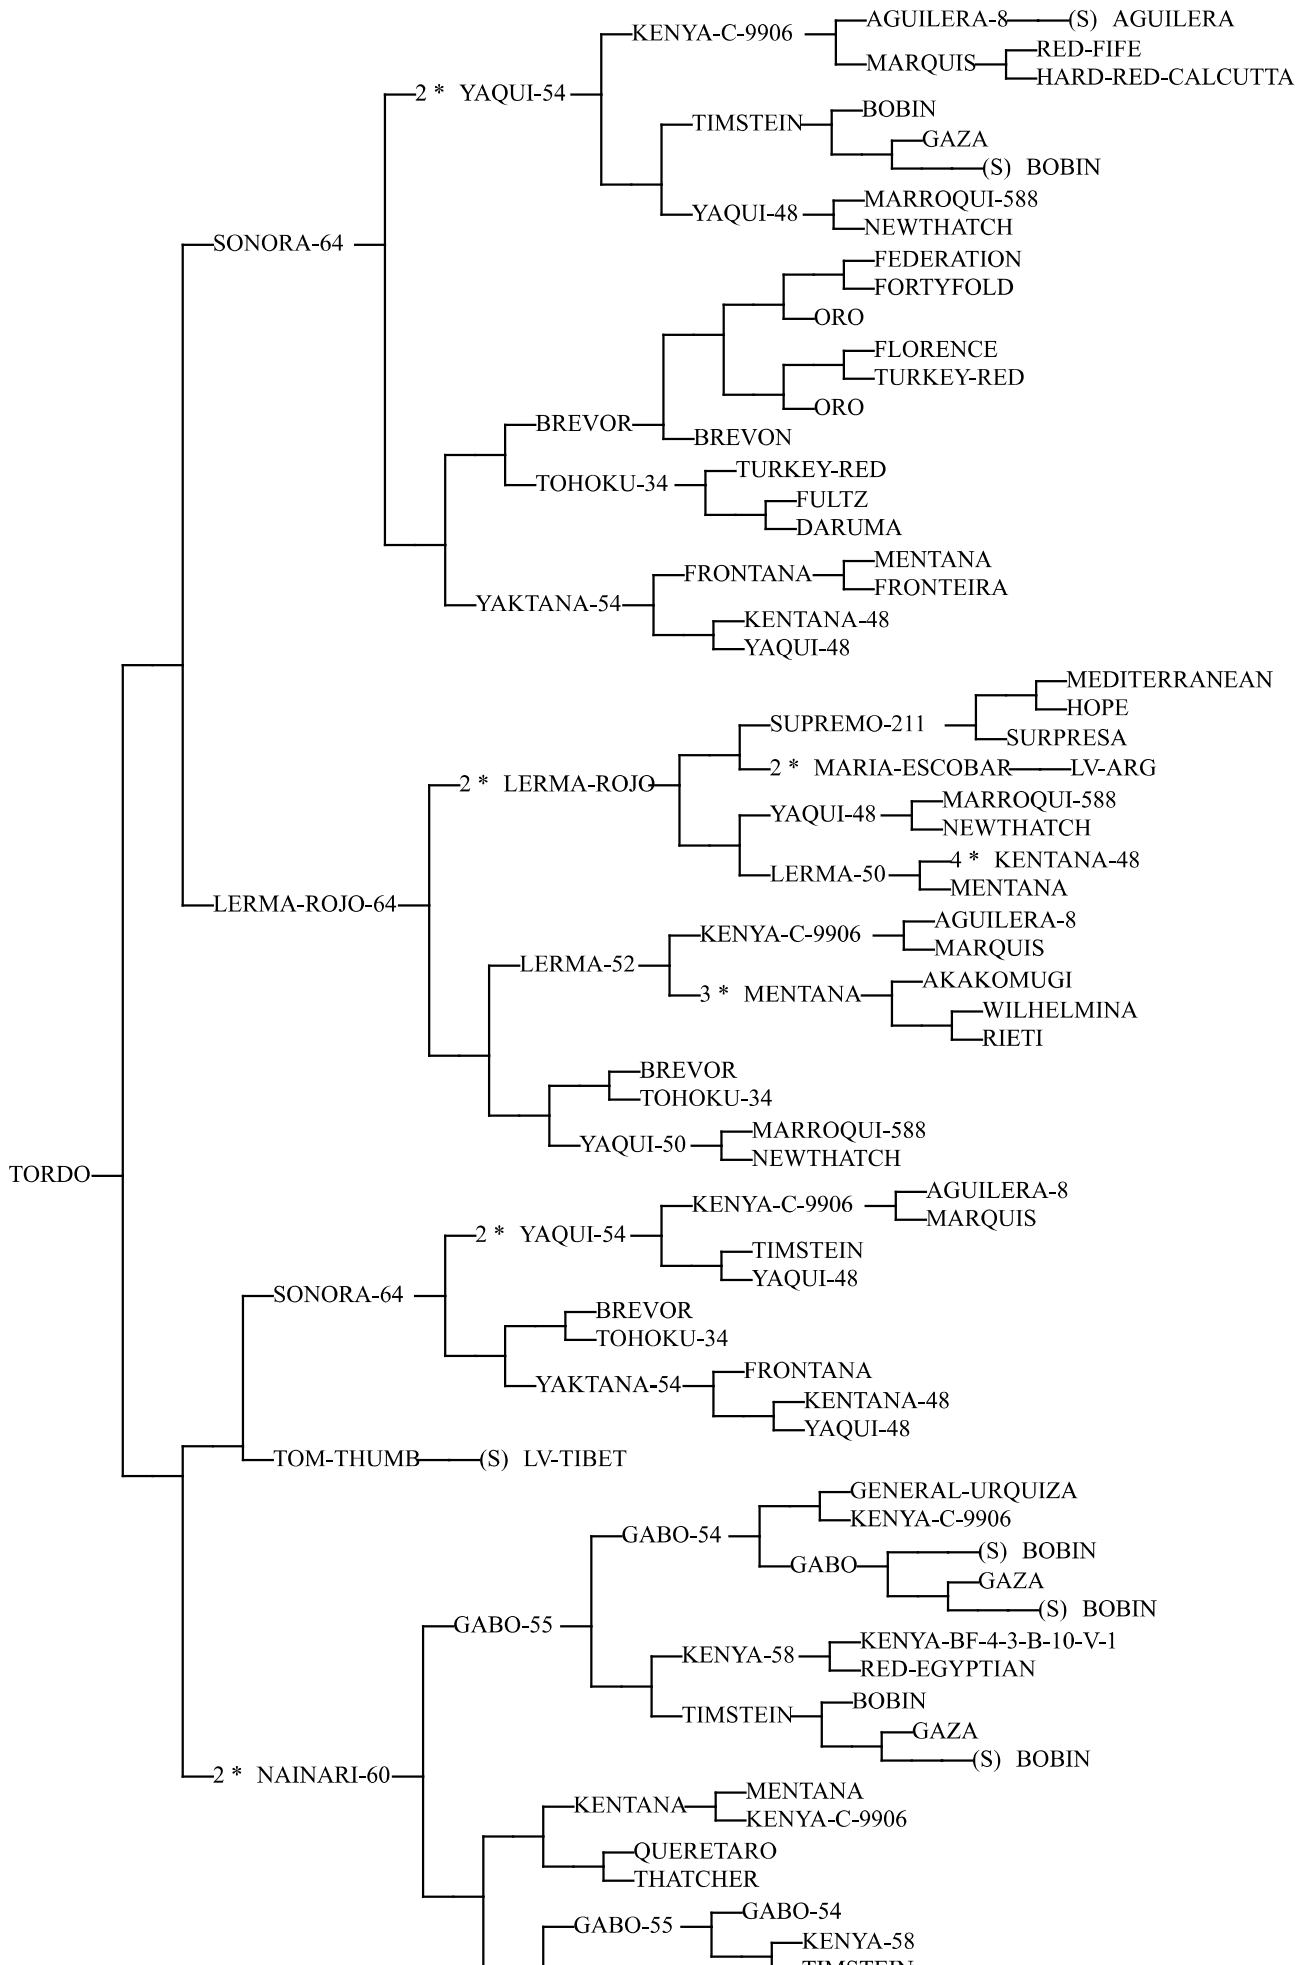

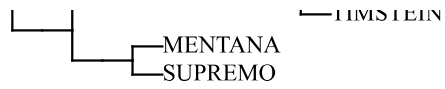

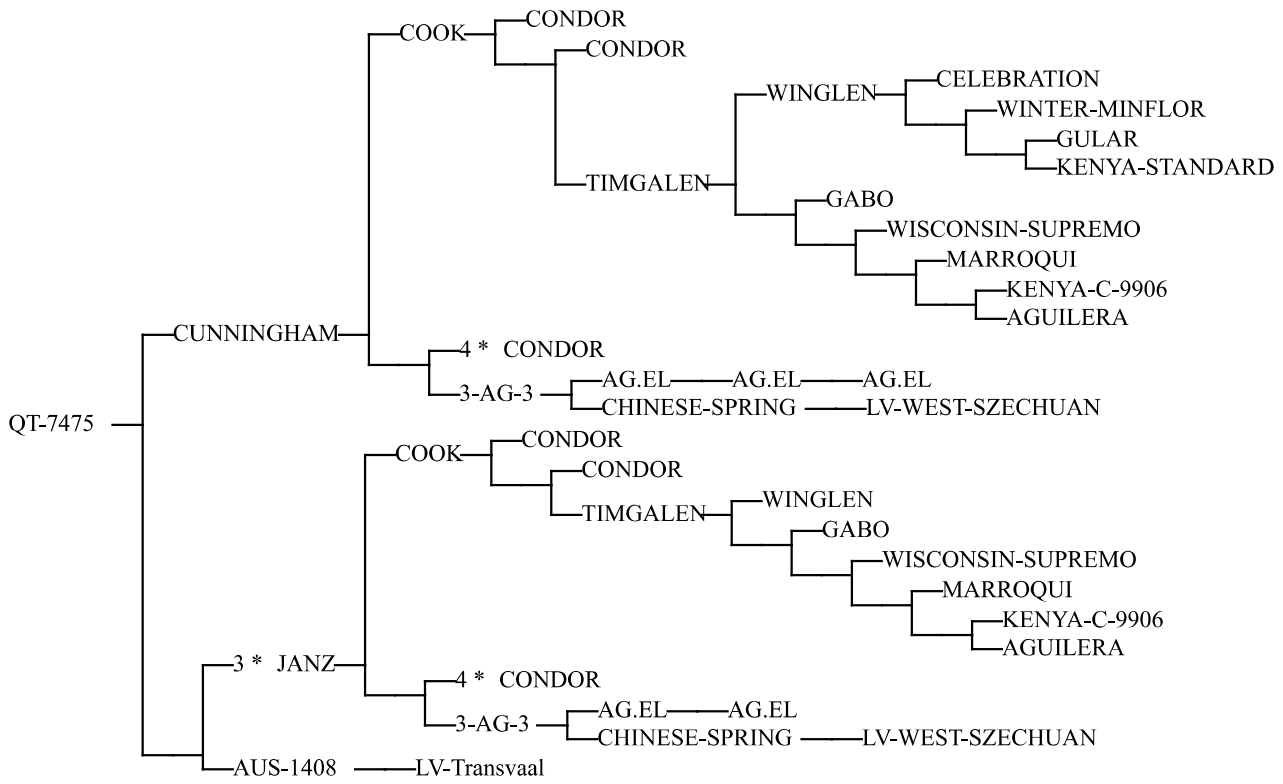

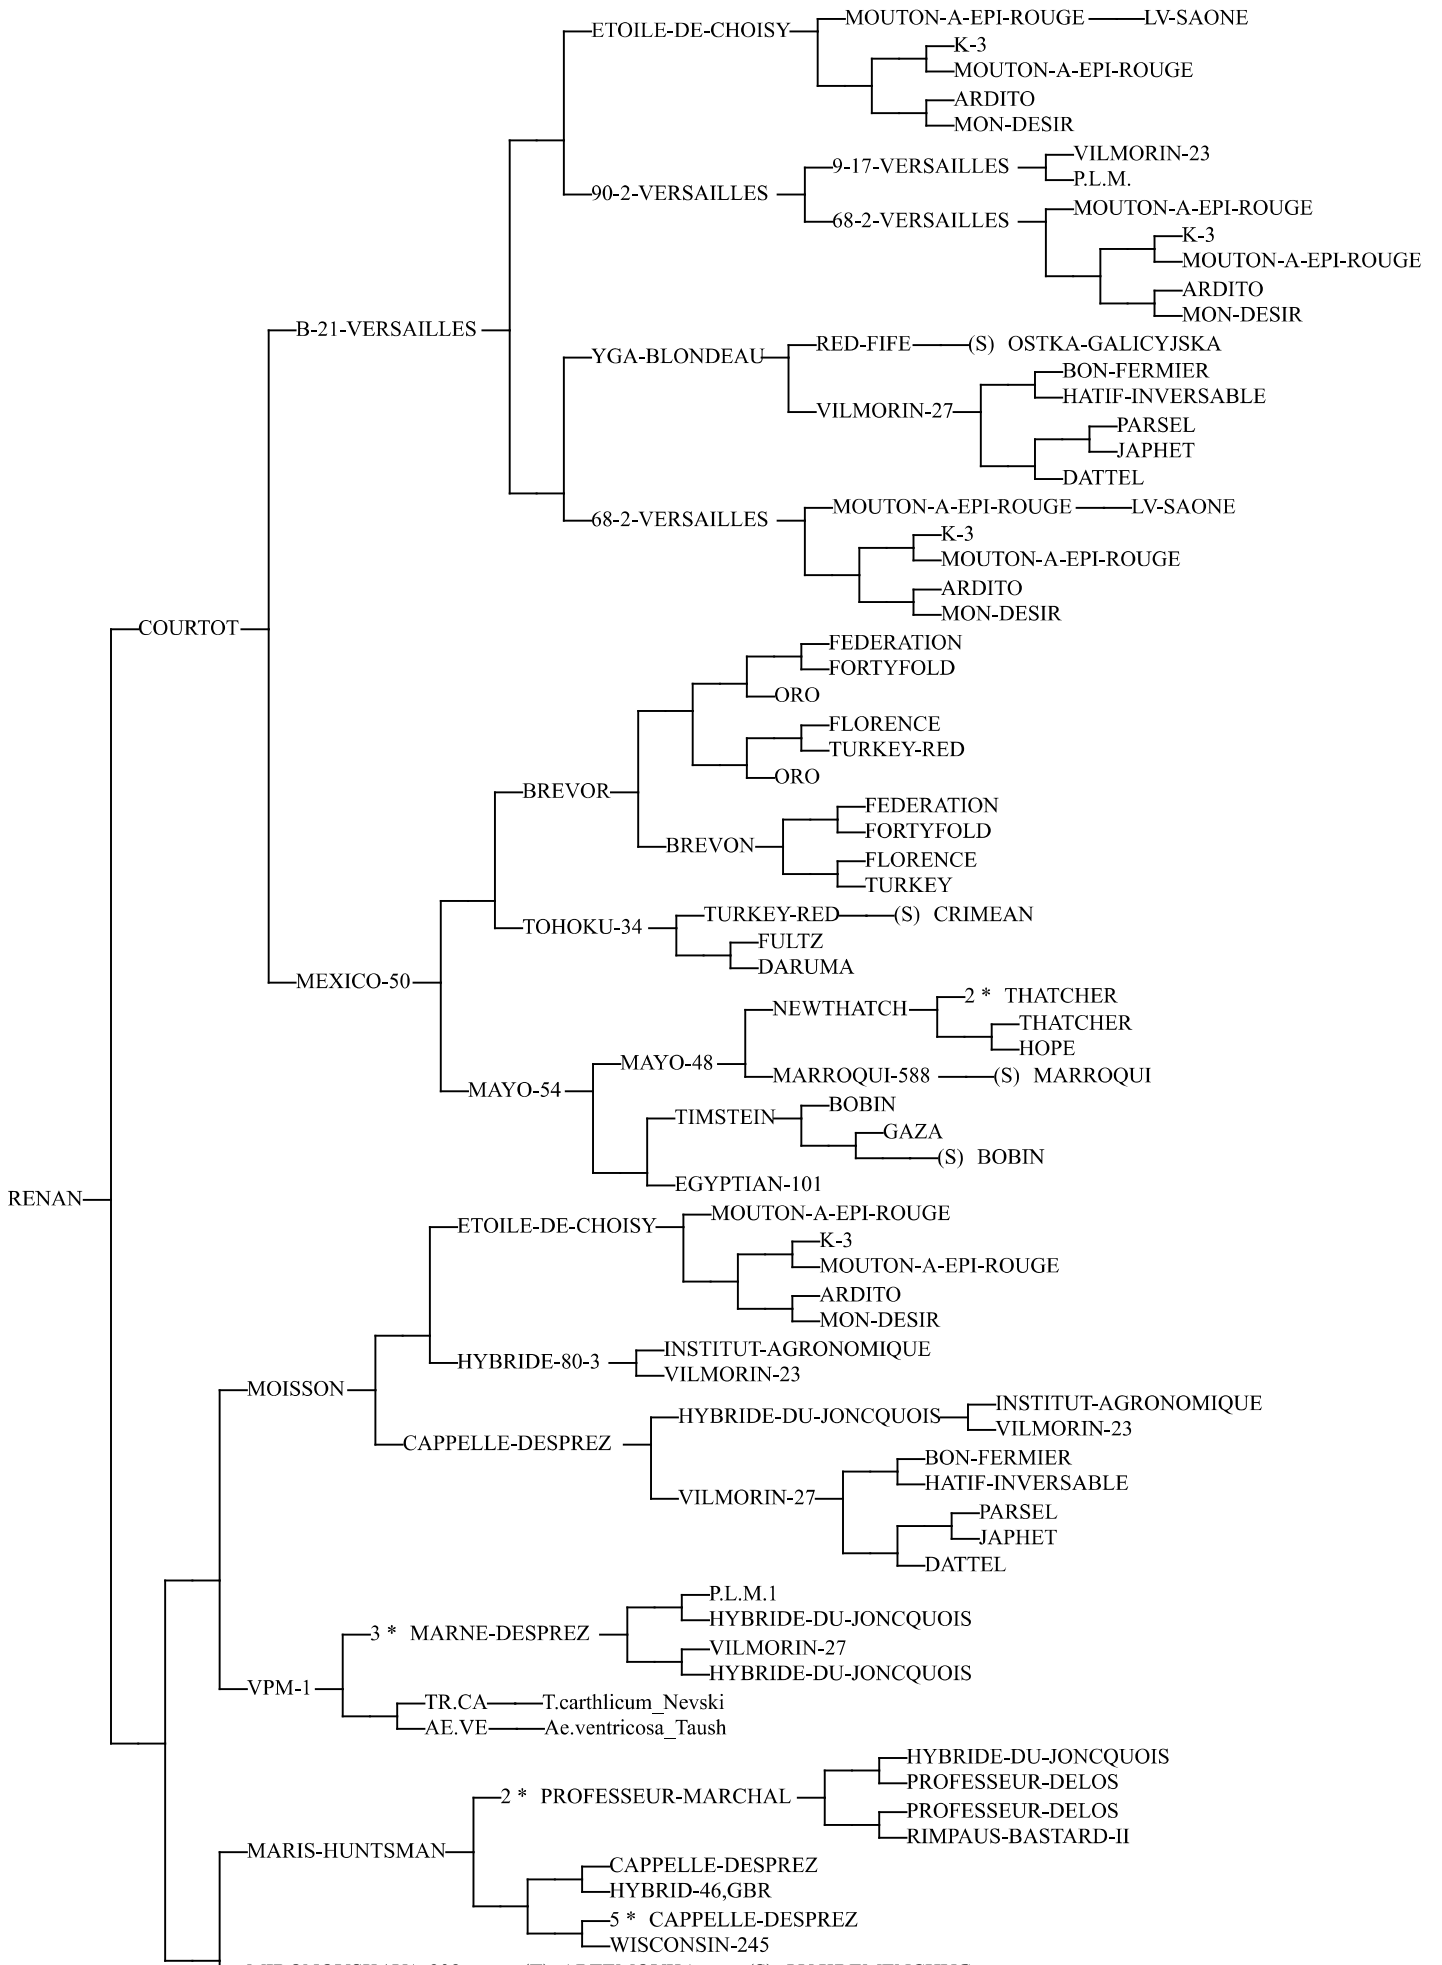



└─MIRONOVSKAYA-808 ──(T) ARTEMOVKA──(S) LV-KREMENCHUG

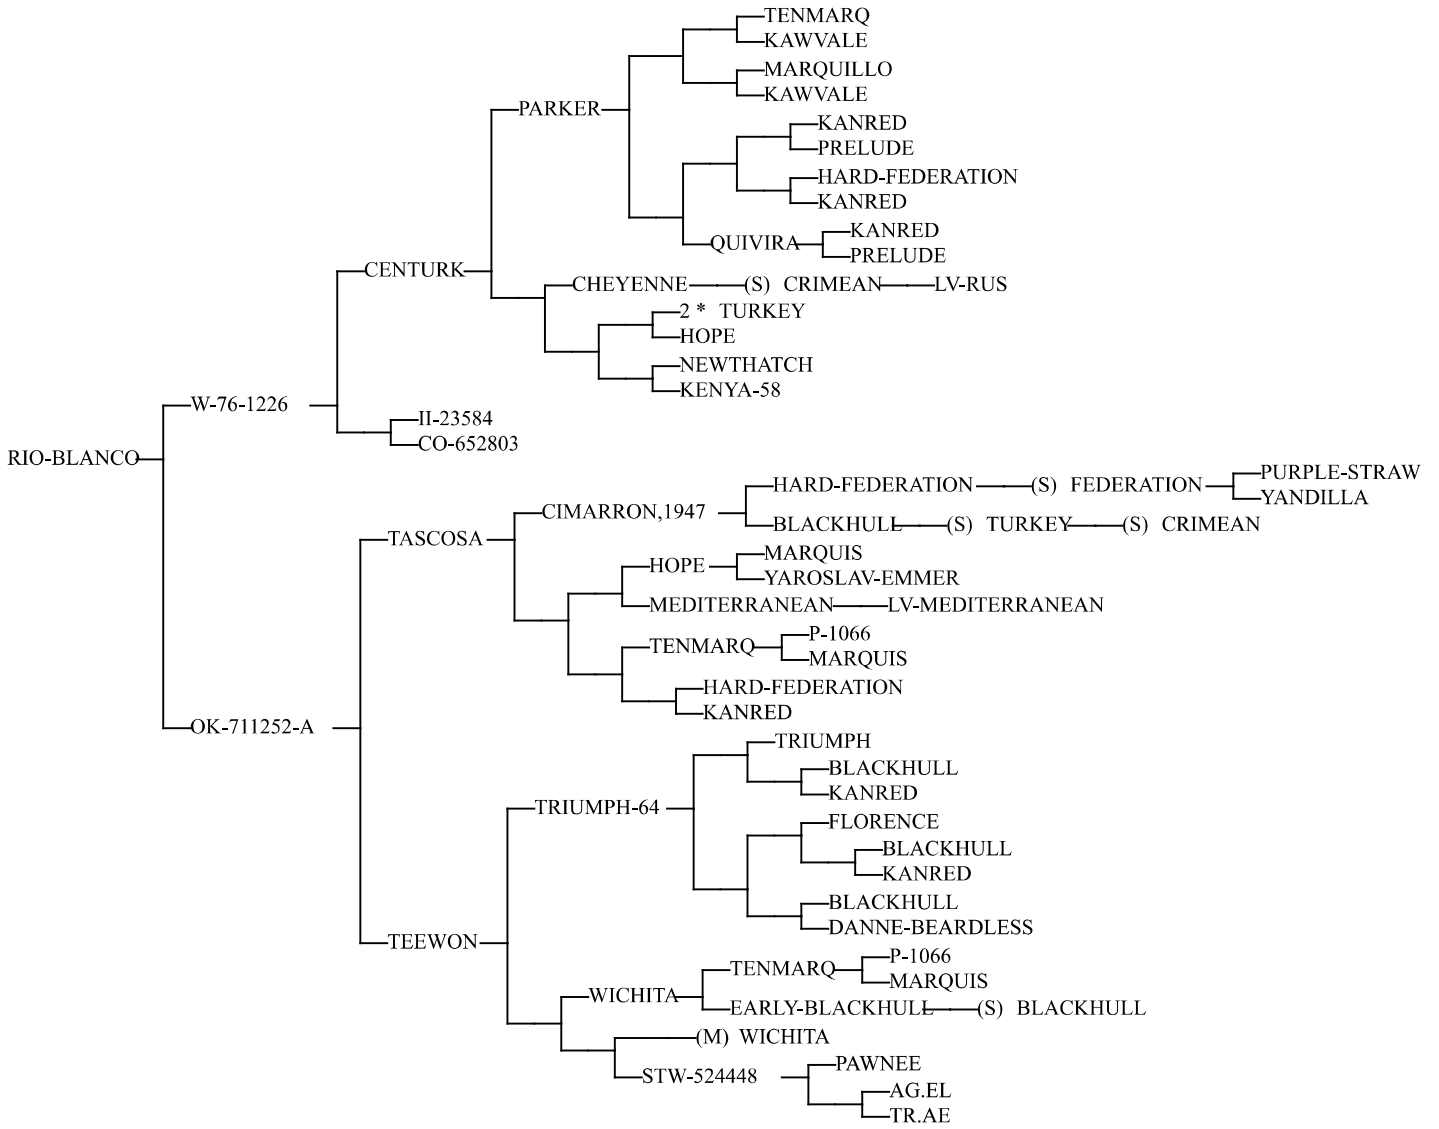

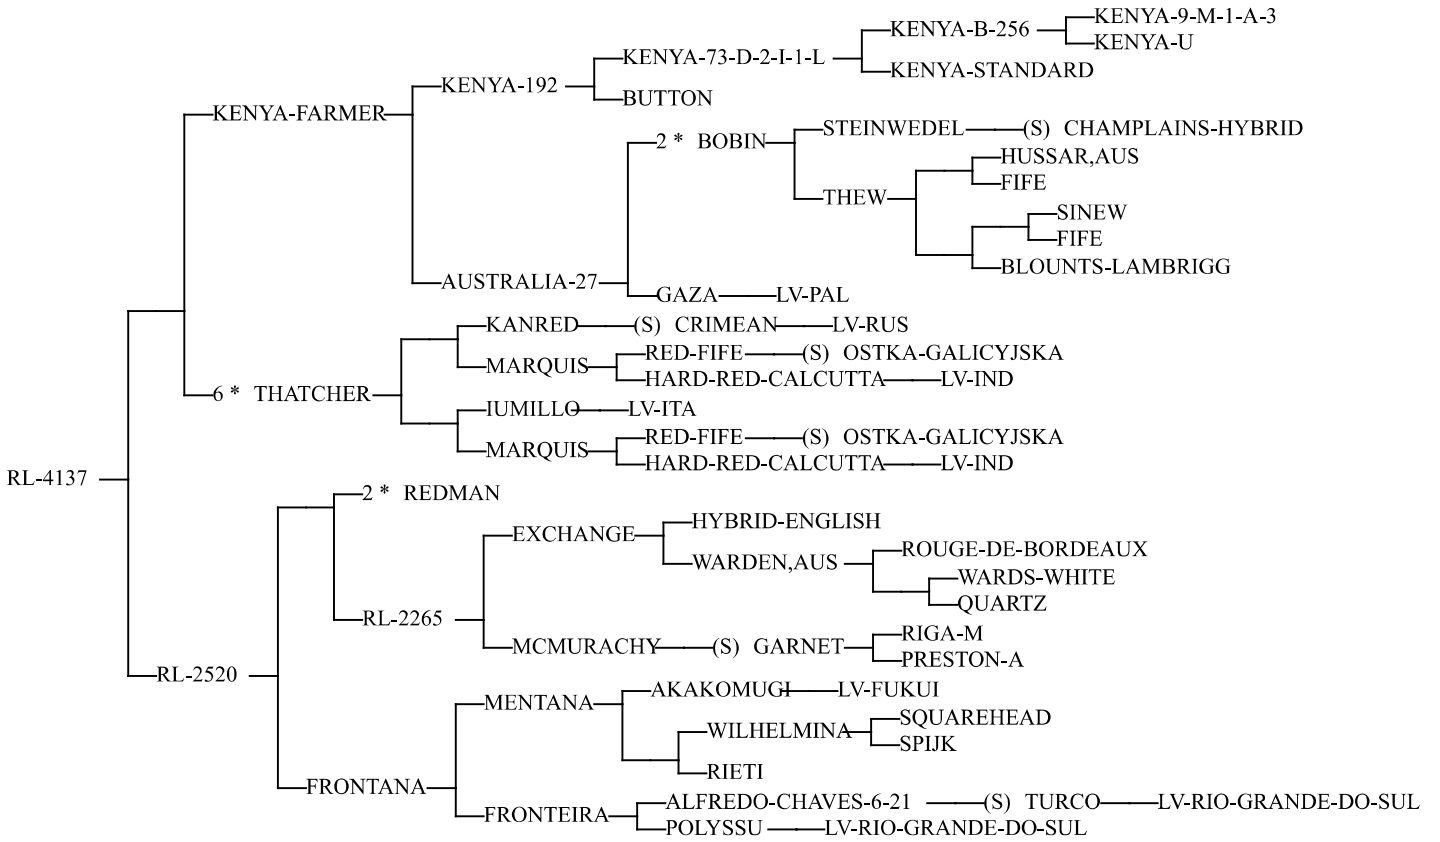

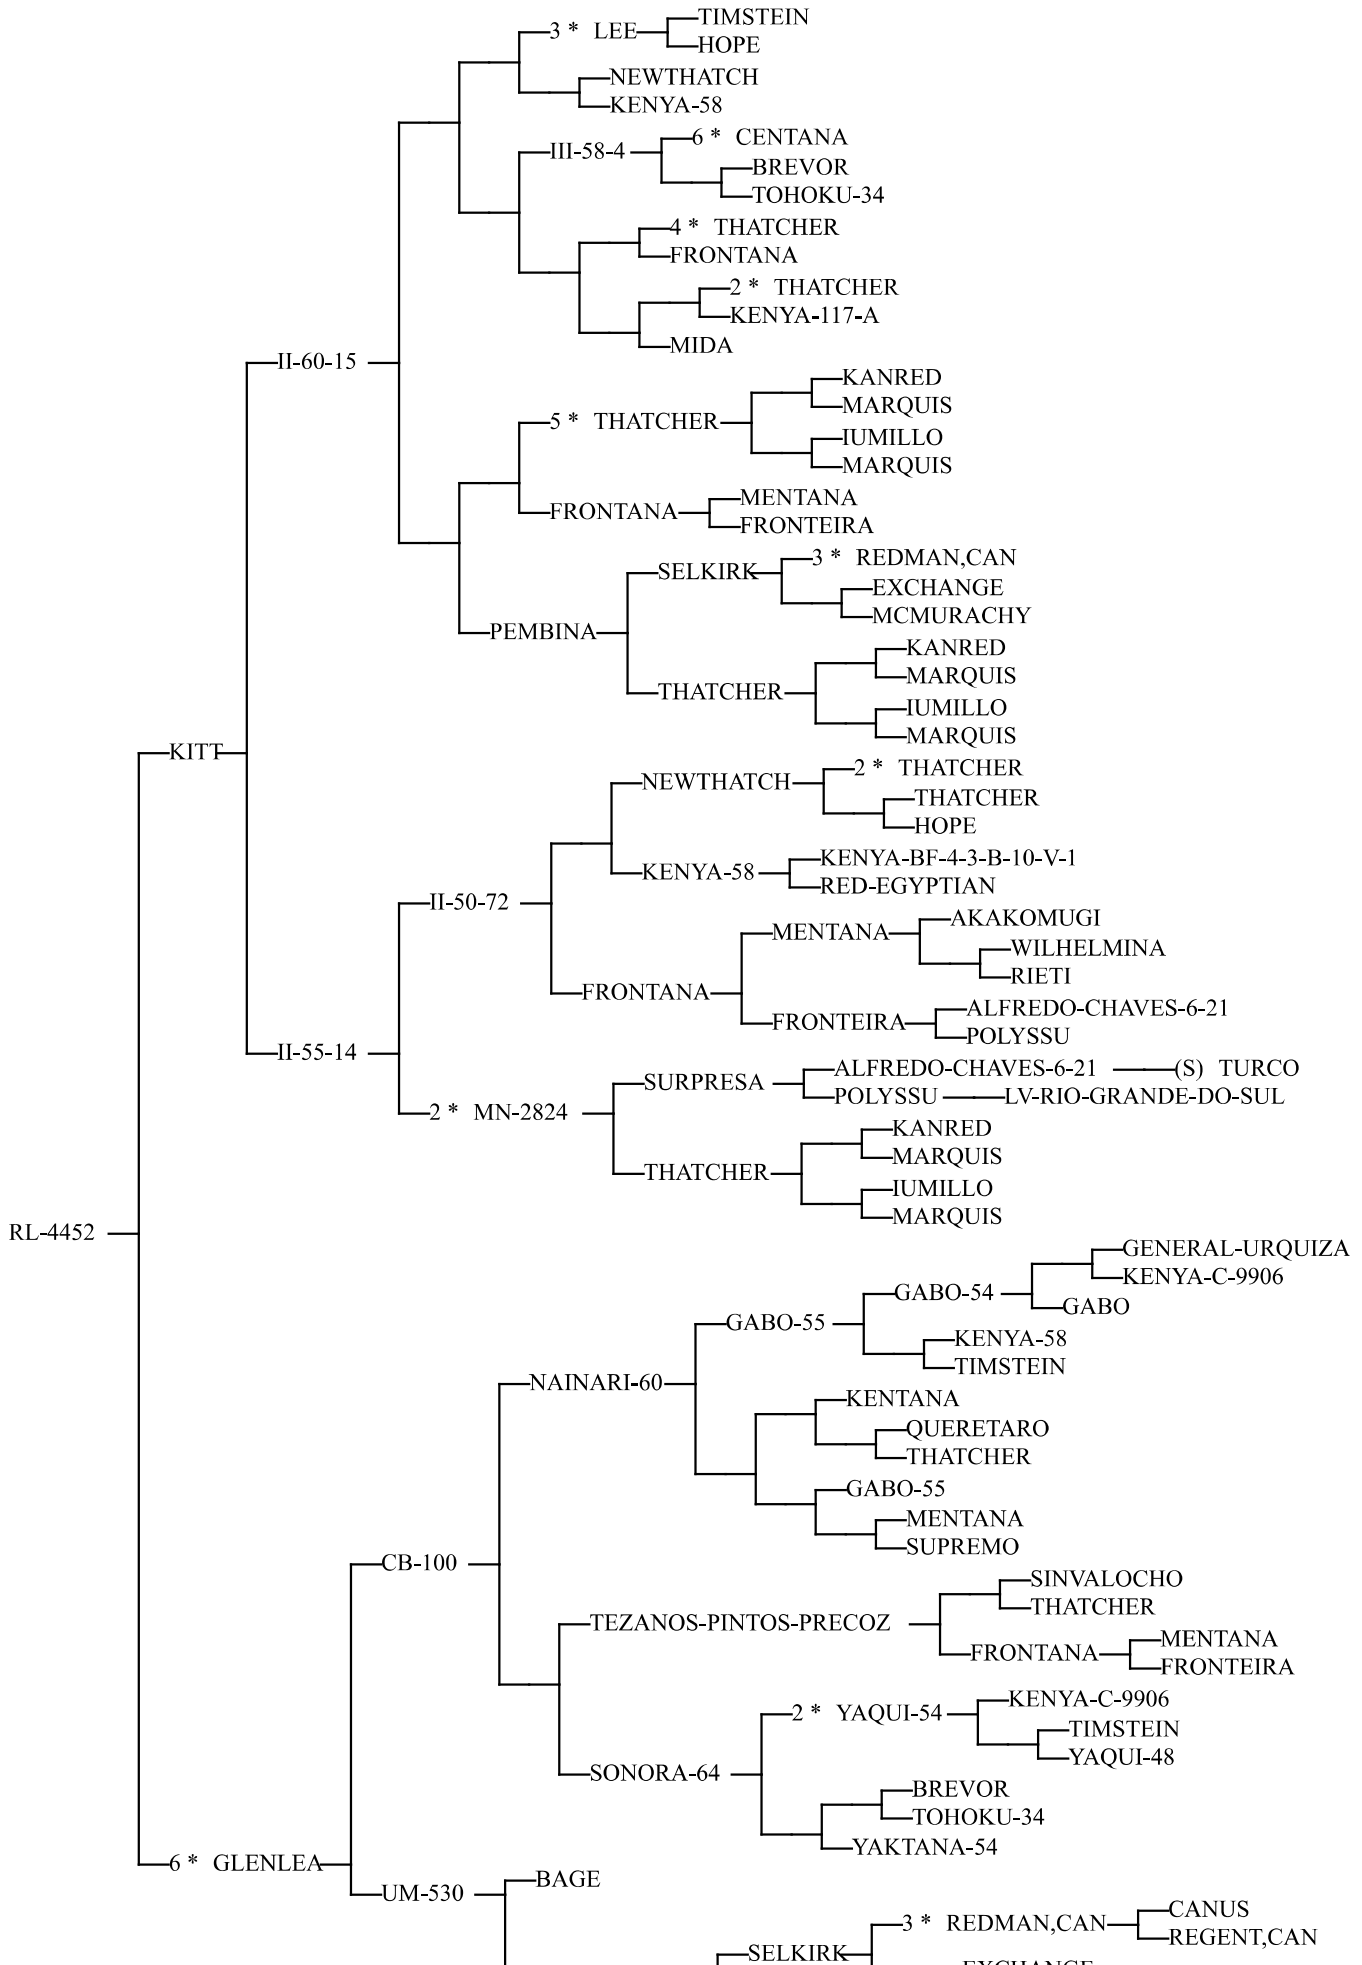

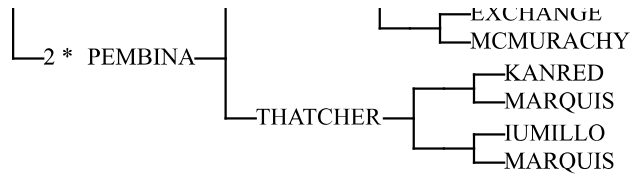

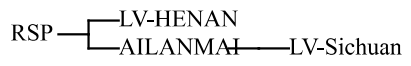

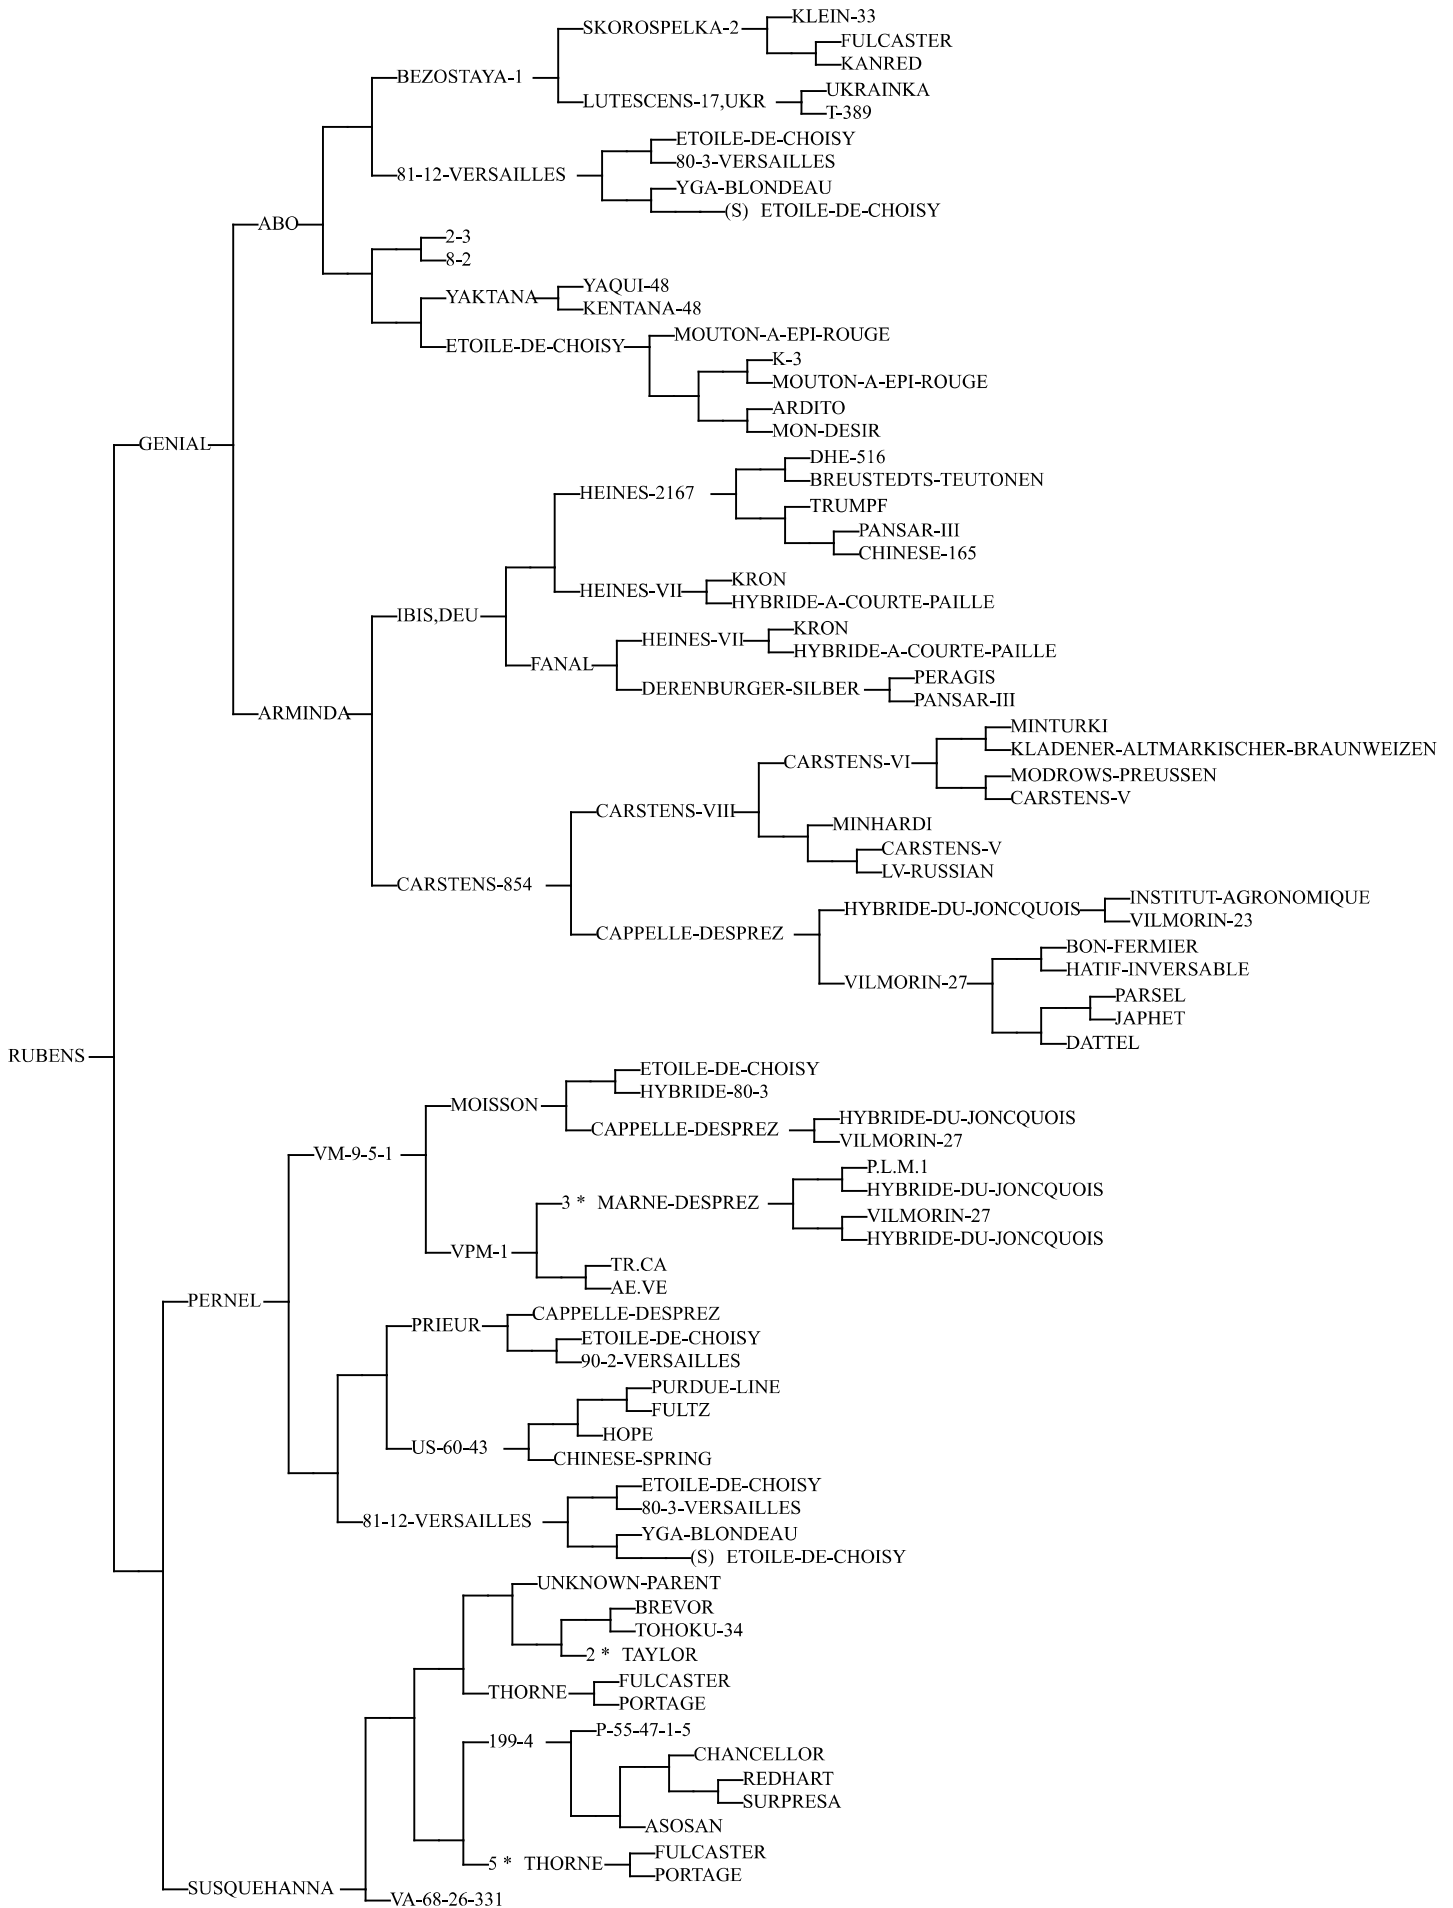

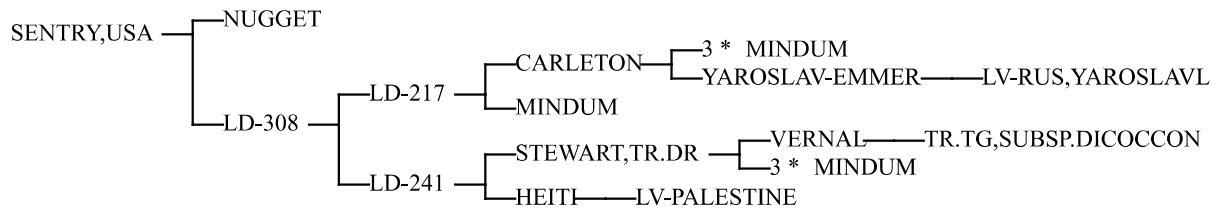



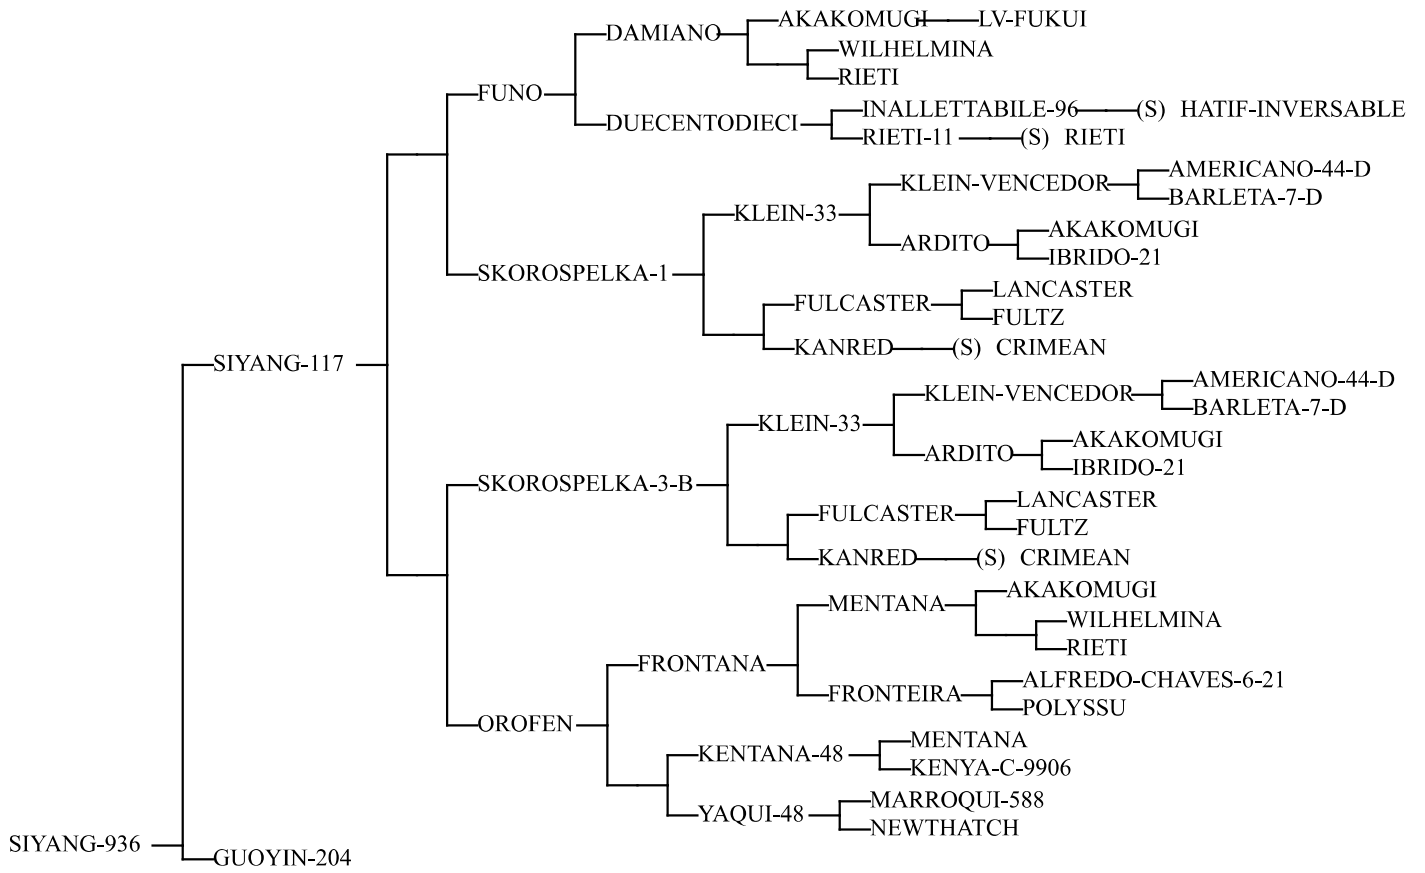

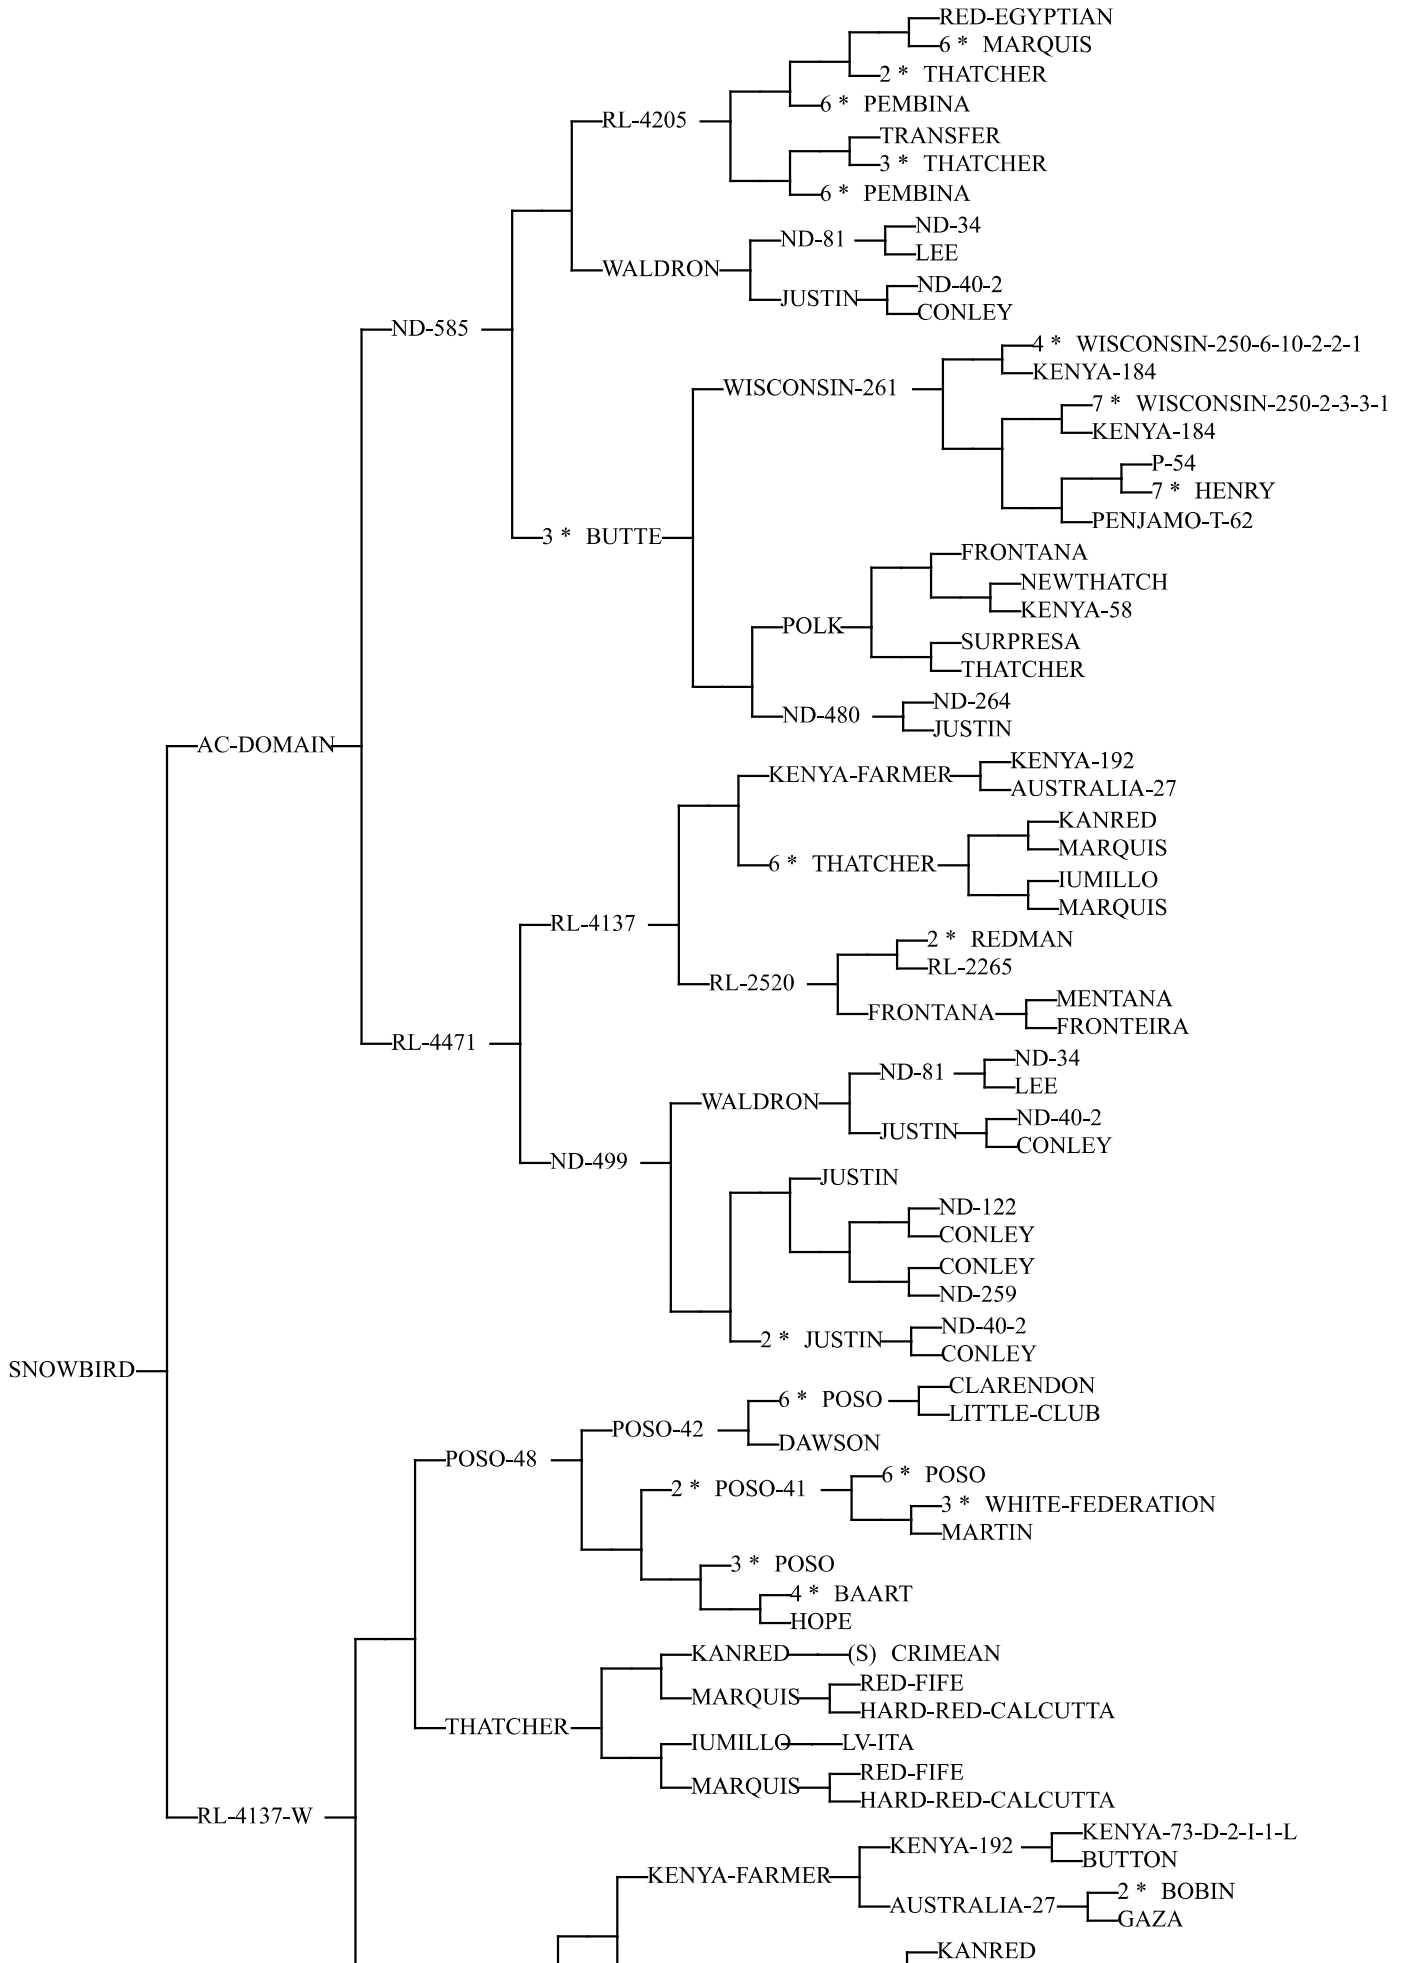

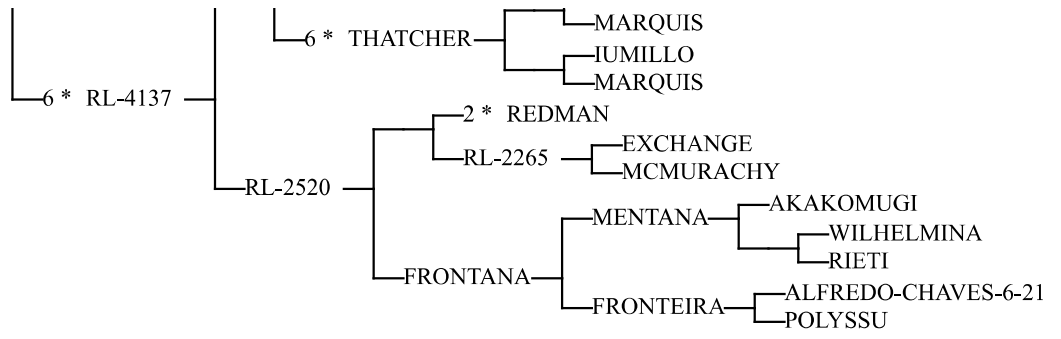

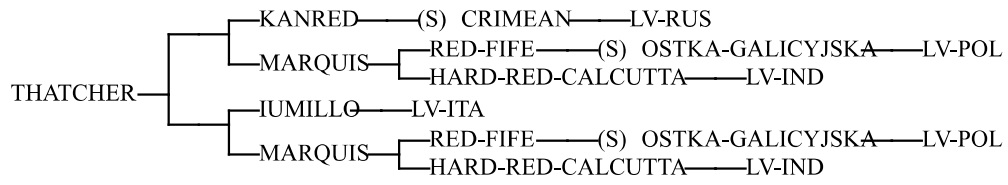

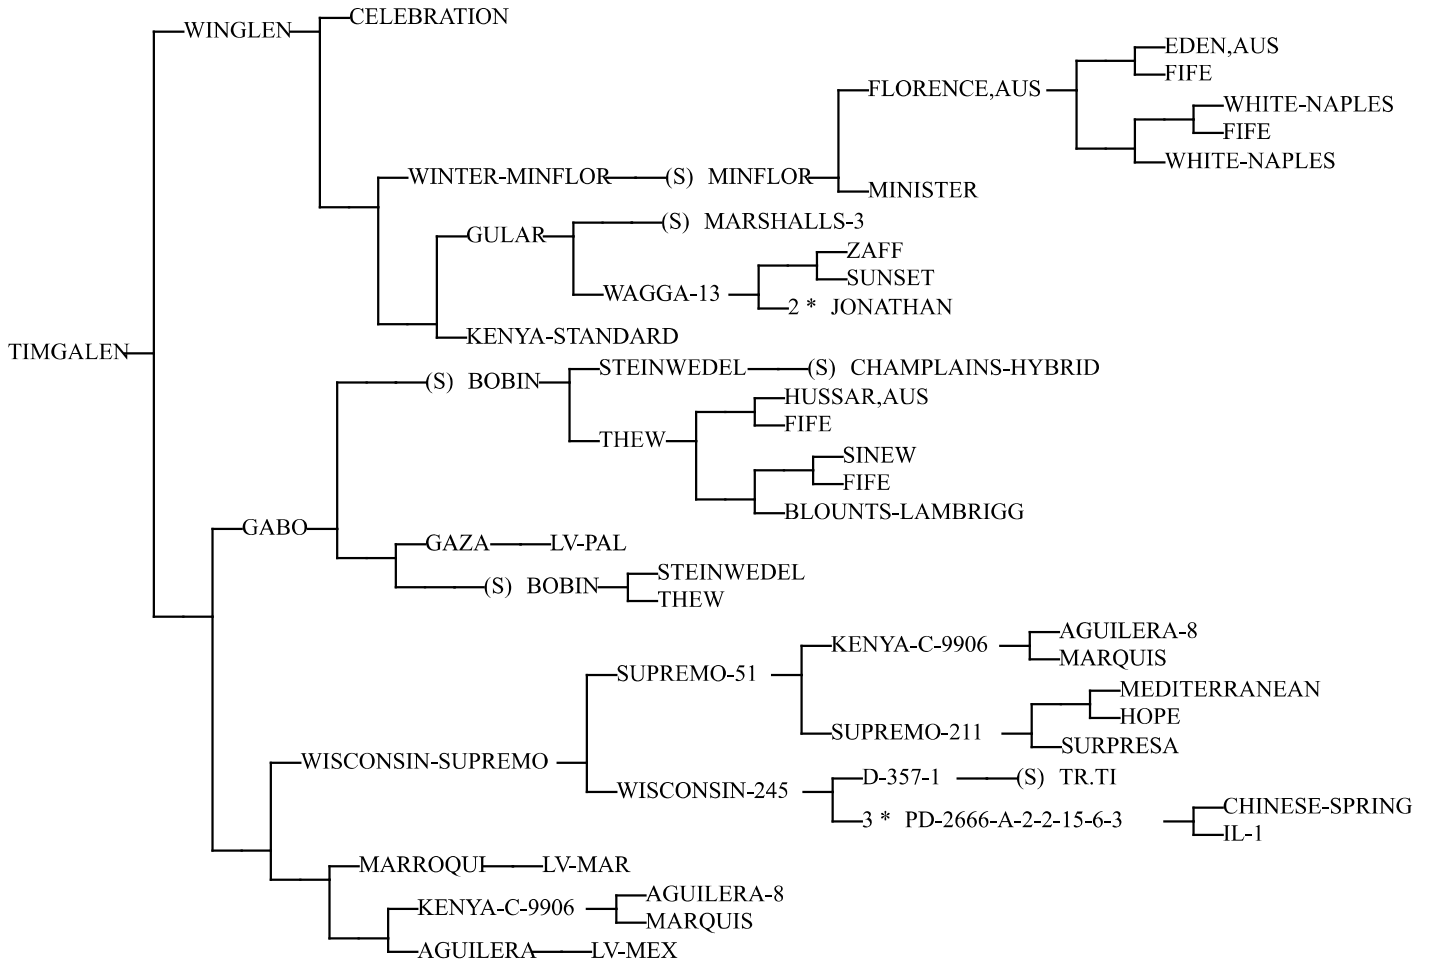

YANDA-1817 —(S) PINGYAO-XIAOBAIMAI—LV-SHANXI

YANGXIAOMAI—LV-CHANG-AN

Yitpi:

Pedigree: (Chamlein\* 8156)\* (Mengavi\*Site Corros) (Chamlein\*8156)\*Hron)\*  
(Mengavi\*Siete Cerros)\* Frame.

Garlinge, J. (2005).



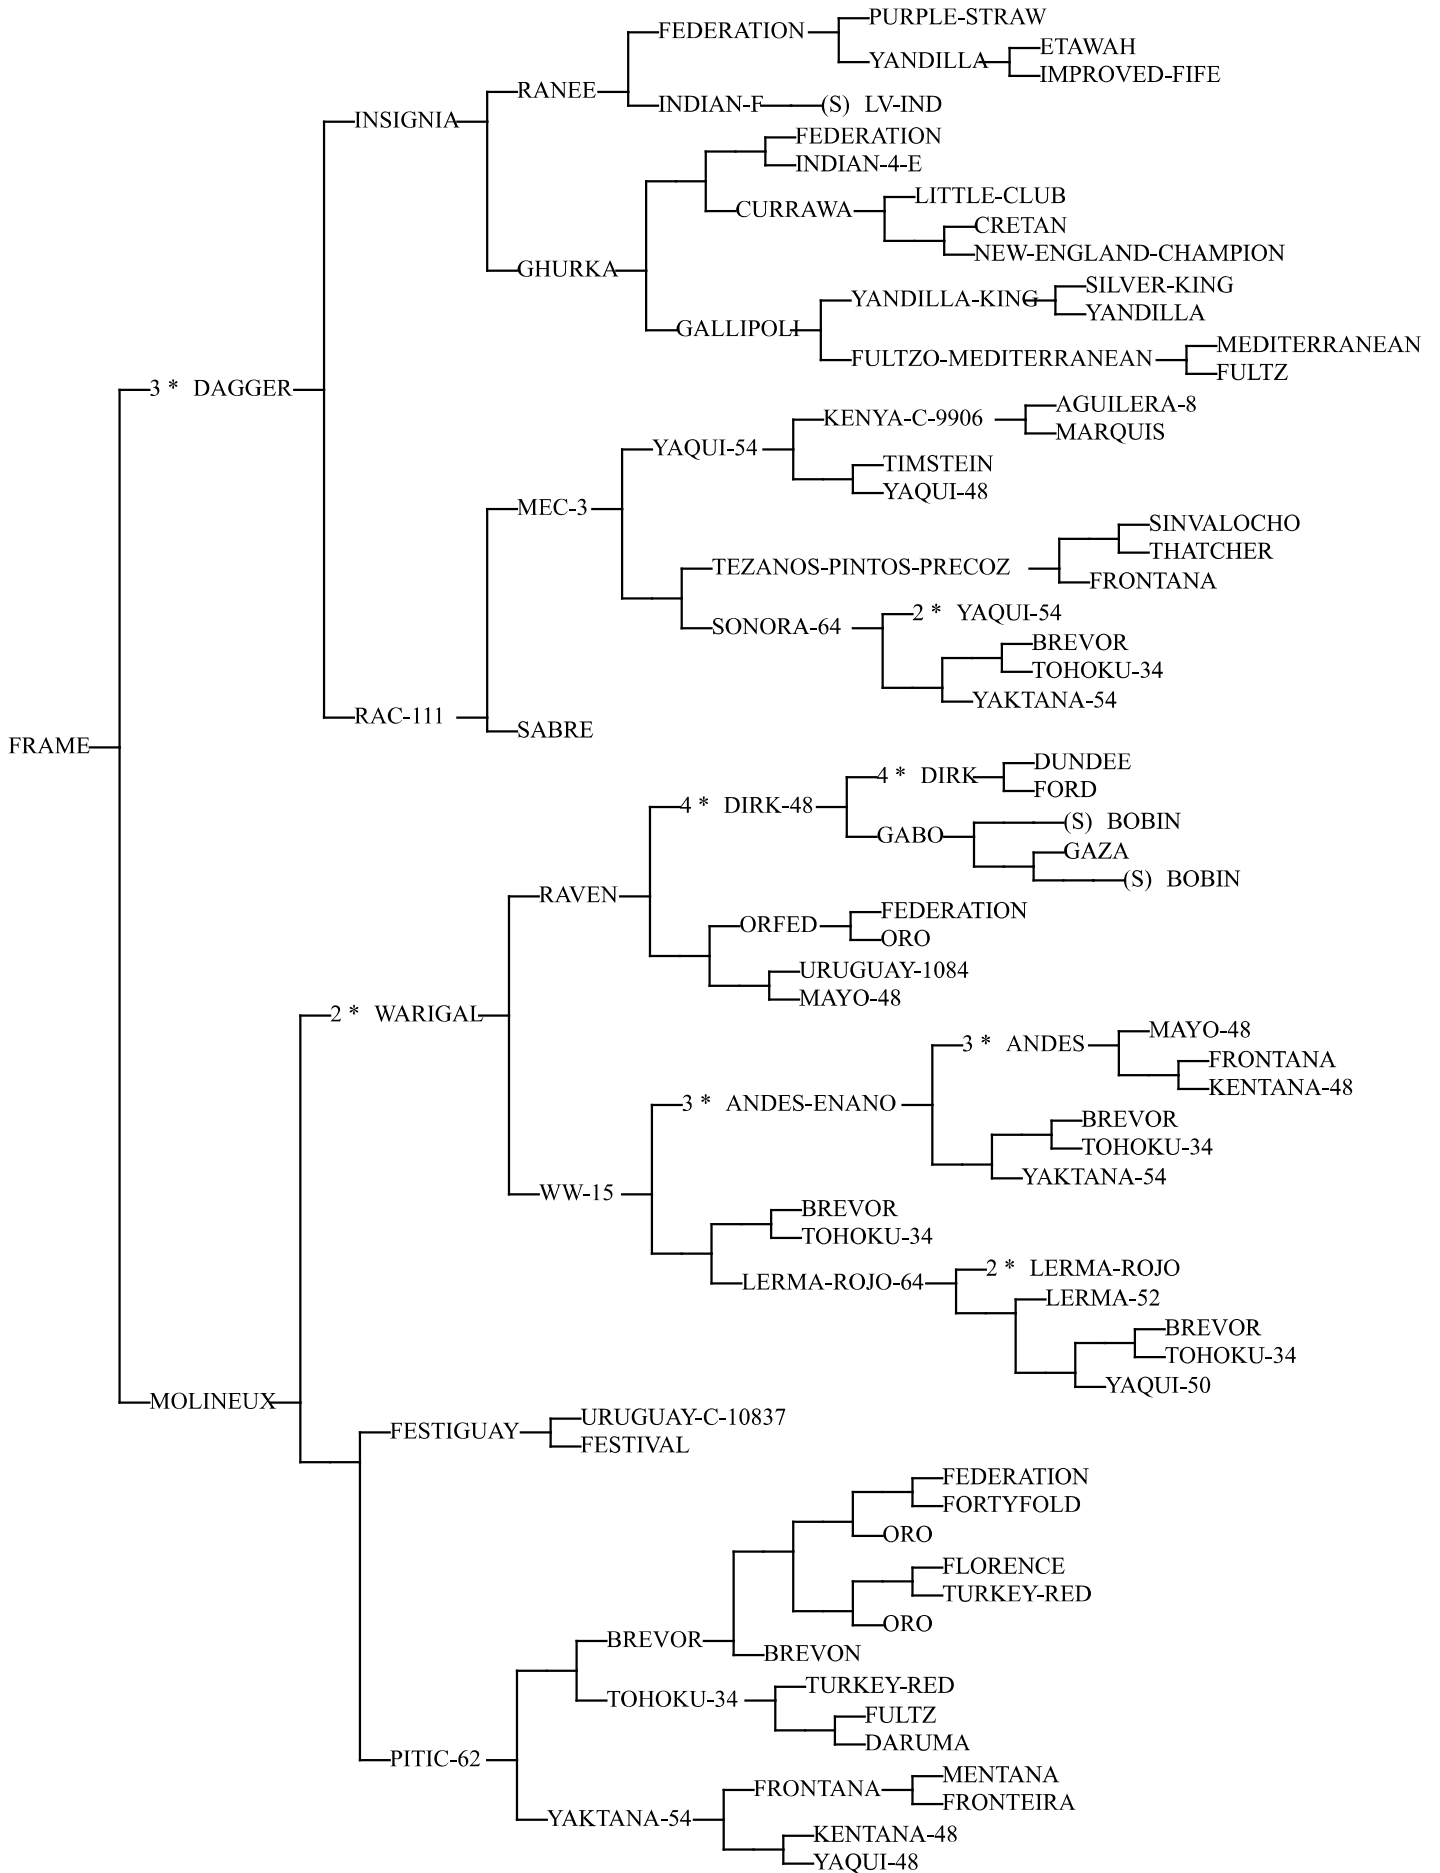

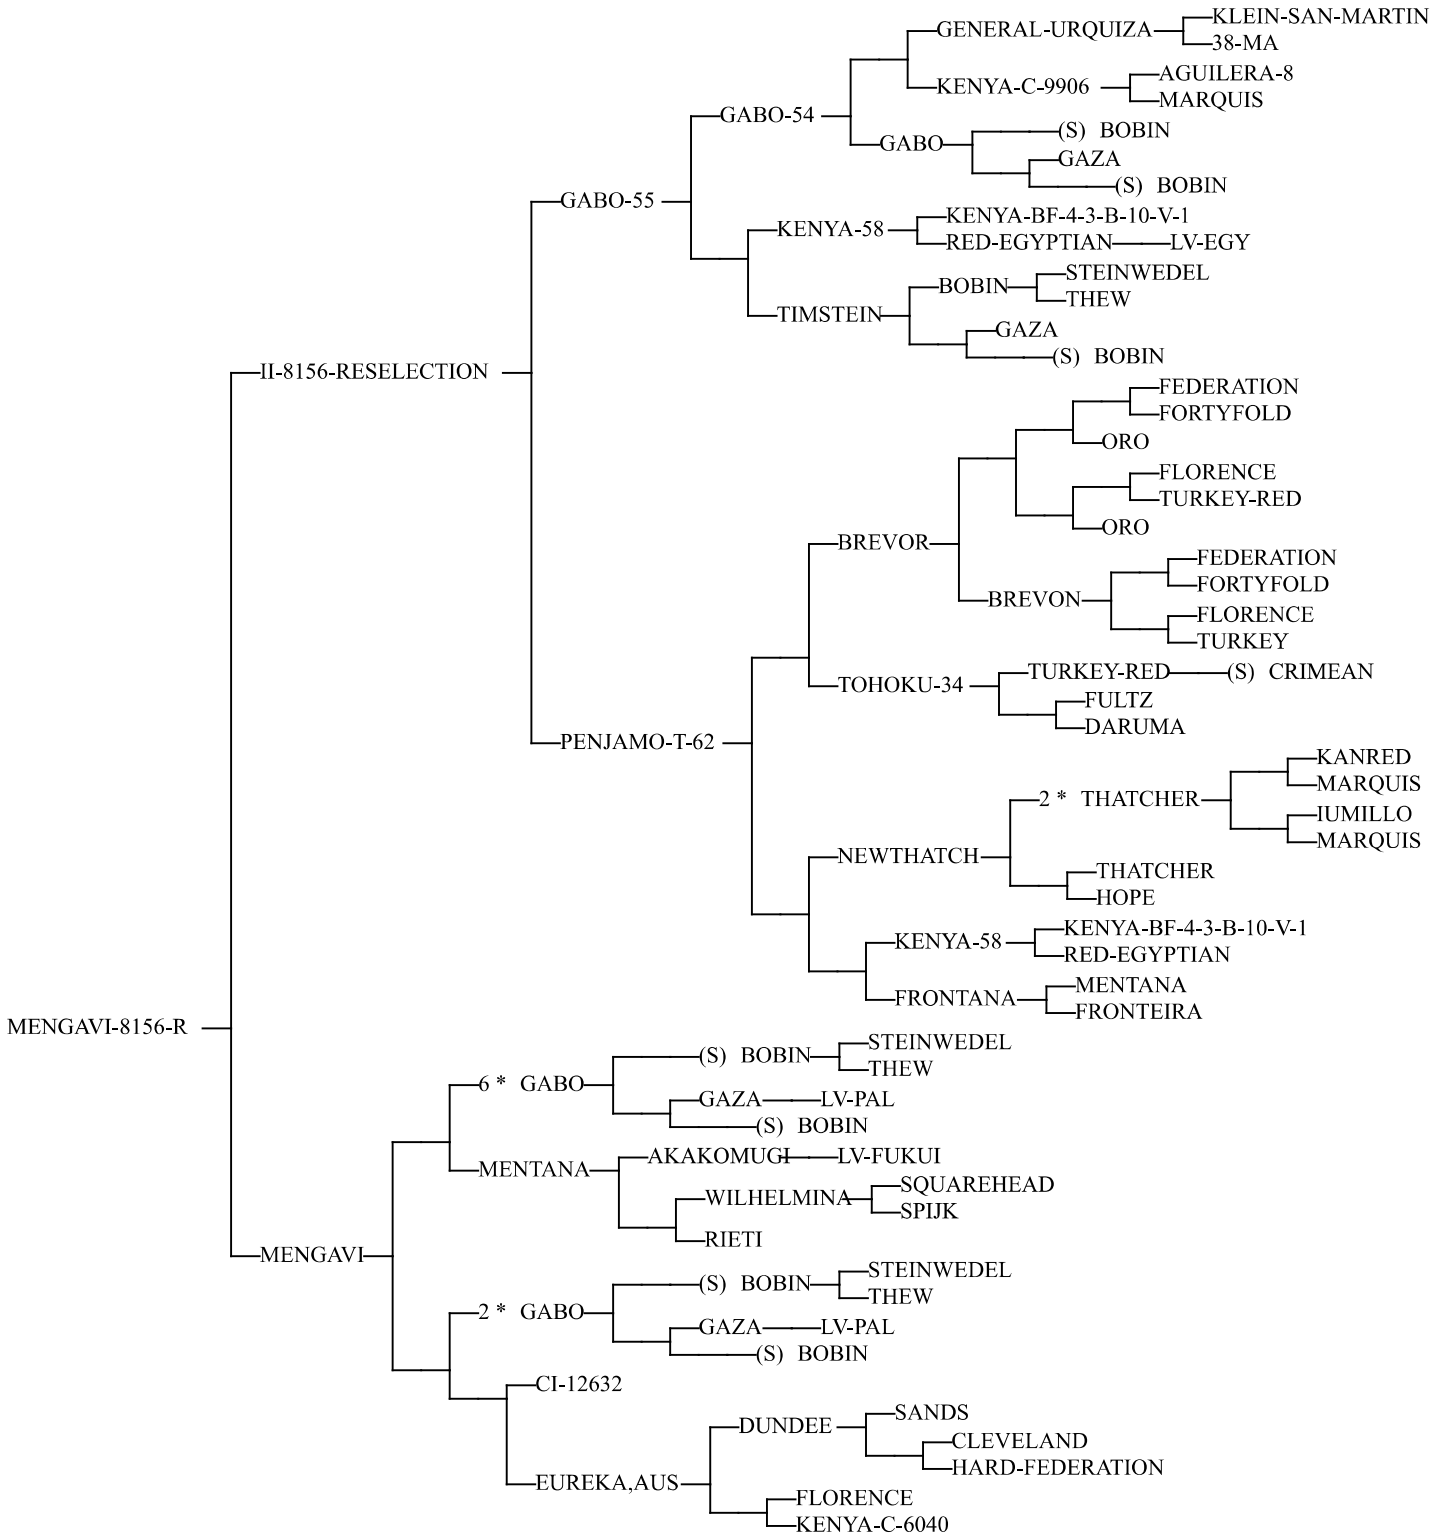

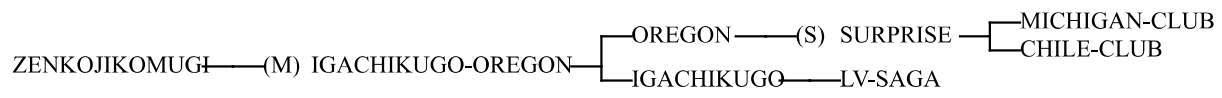

ZHONGYOU-9507 —(S) ZHONGZUO-8131-1
